# Supplementary material for: Acute sleep loss results in tissue-specific alterations in genome-wide DNA methylation state and metabolic fuel utilization in humans
Source: PubMed Central journal article supplement — Sci Adv. 2018 Aug 22;4(8):eaar8590. doi: 10.1126/sciadv.aar8590 (PMC6105229; doi:10.1126/sciadv.aar8590), 2018-08-22
Supplement: aar8590_SM.pdf [file aar8590_SM.pdf]

## Supplementary Materials for

### **Acute sleep loss results in tissue-specific alterations in genome-wide DNA methylation state and metabolic fuel utilization in humans**

Jonathan Cedernaes\*, Milena Schönke, Jakub Orzechowski Westholm, Jia Mi, Alexander Chibalin, Sarah Voisin, Megan Osler, Heike Vogel, Katarina Hörnaeus, Suzanne L. Dickson, Sara Bergström Lind, Jonas Bergquist, Helgi B Schiöth, Juleen R. Zierath, Christian Benedict

\*Corresponding author. Email: jonathan.cedernaes@neuro.uu.se

Published 22 August 2018, *Sci. Adv.* 4, eaar8590 (2018)

DOI: 10.1126/sciadv.aar8590

#### **This PDF file includes:**

Fig. S1. Correlations between methylation and gene expression levels in subcutaneous adipose tissue and skeletal muscle at baseline and in response to acute sleep loss in humans.

Fig. S2. Insulin sensitivity is adversely affected, and cortisol levels are significantly elevated following acute sleep loss in healthy young men without changes to protein levels of mitochondrial complexes.

Fig. S3. Gene expression and protein levels correlate at baseline but not in response to sleep loss in subcutaneous adipose tissue and skeletal muscle in humans.

Fig. S4. Loading controls for Western blots used throughout the manuscript.

Table S1. Data for the 15 participants that were included in the study.

Table S2. DMRs and enriched biological pathways based on methylation changes in subcutaneous adipose tissue in response to acute sleep loss.

Table S3. Differentially expressed genes in skeletal muscle and subcutaneous adipose tissue in response to acute sleep loss.

Table S4. Altered pathways and transcription factors based on RNA-seq data from skeletal muscle and subcutaneous adipose tissue in response to acute sleep loss compared with normal sleep.

Table S5. Enriched pathways based on proteomic analyses of skeletal muscle tissue in response to acute sleep loss compared with normal sleep.

Table S6. Changes in serum, skeletal muscle, and subcutaneous adipose tissue metabolites in response to acute sleep loss.

Supplementary Methods

References (62–82)

## Supplementary Figures and Figure Legends

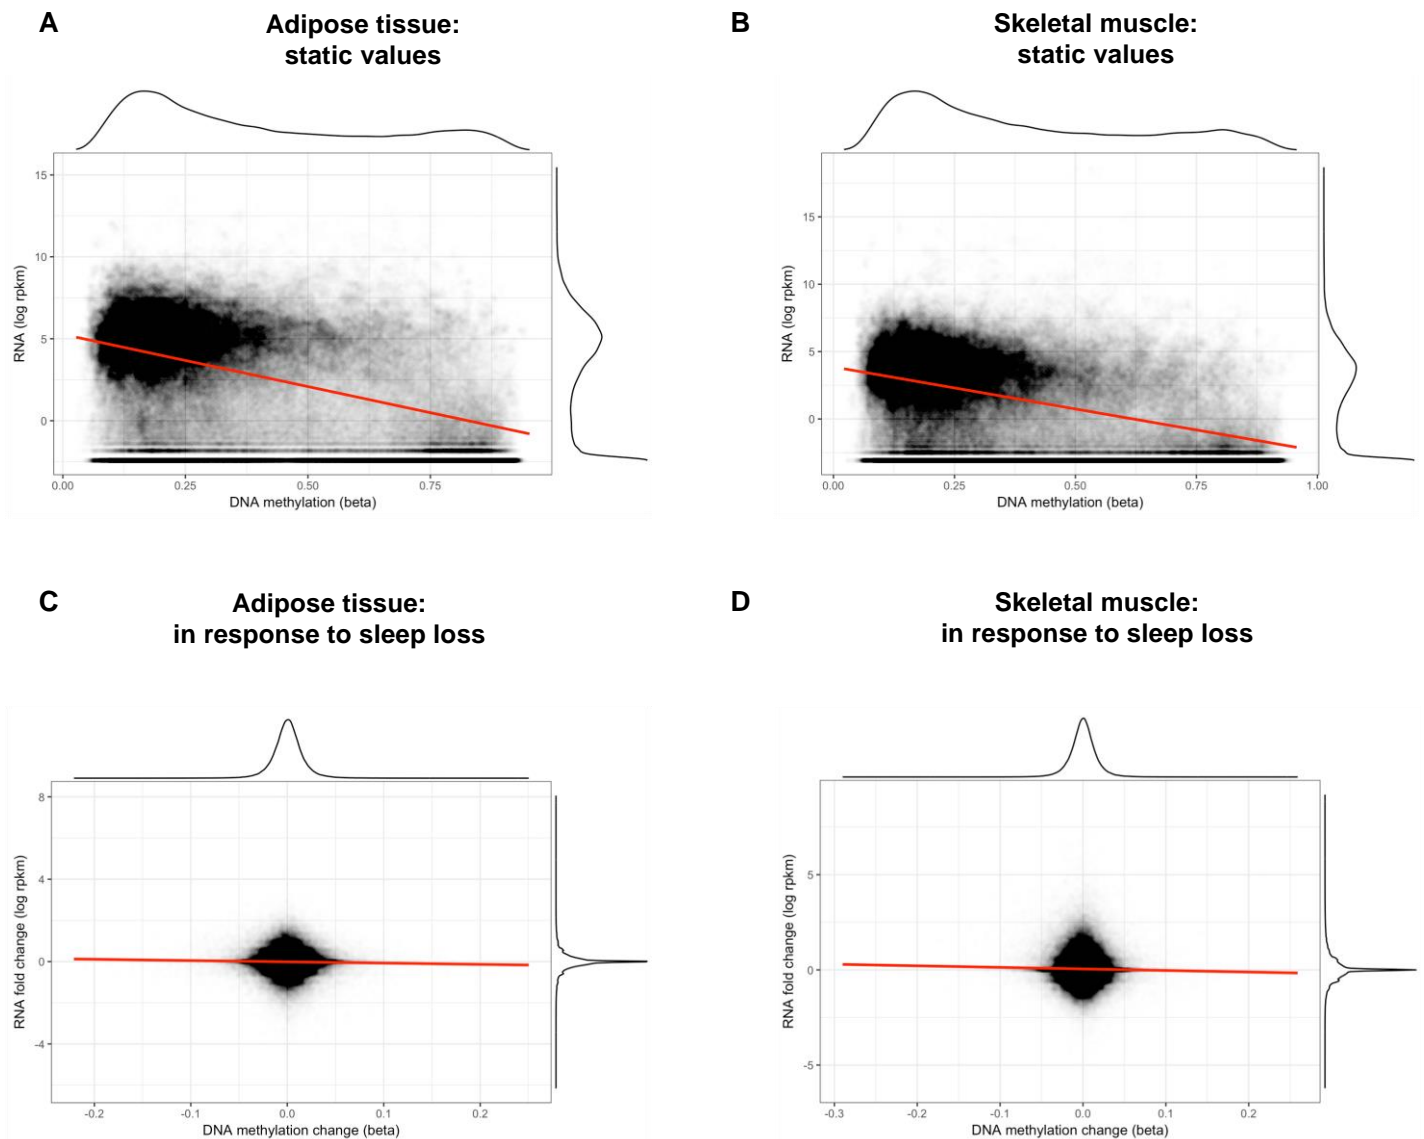

**Fig. S1. Correlations between methylation and gene expression levels in subcutaneous adipose tissue and skeletal muscle at baseline and in response to acute sleep loss in humans.** Top panels show correlations in “static” samples, i.e. without considering the changes in levels of DNA methylation (shown as beta value on the x axis) and gene expression (shown as log RPKM on the y axis) in response to sleep deprivation, in (A) subcutaneous adipose tissue, and (B) skeletal muscle. In panels C-D, fold changes in DNA methylation (change in beta level) and gene expression levels (log fold change in RPKM) in response to sleep loss were utilized to analyze correlations between sleep loss-induced changes at these two genomic levels in (C) subcutaneous adipose tissue, and (D) in skeletal muscle (with n=15 pairs for each analysis).

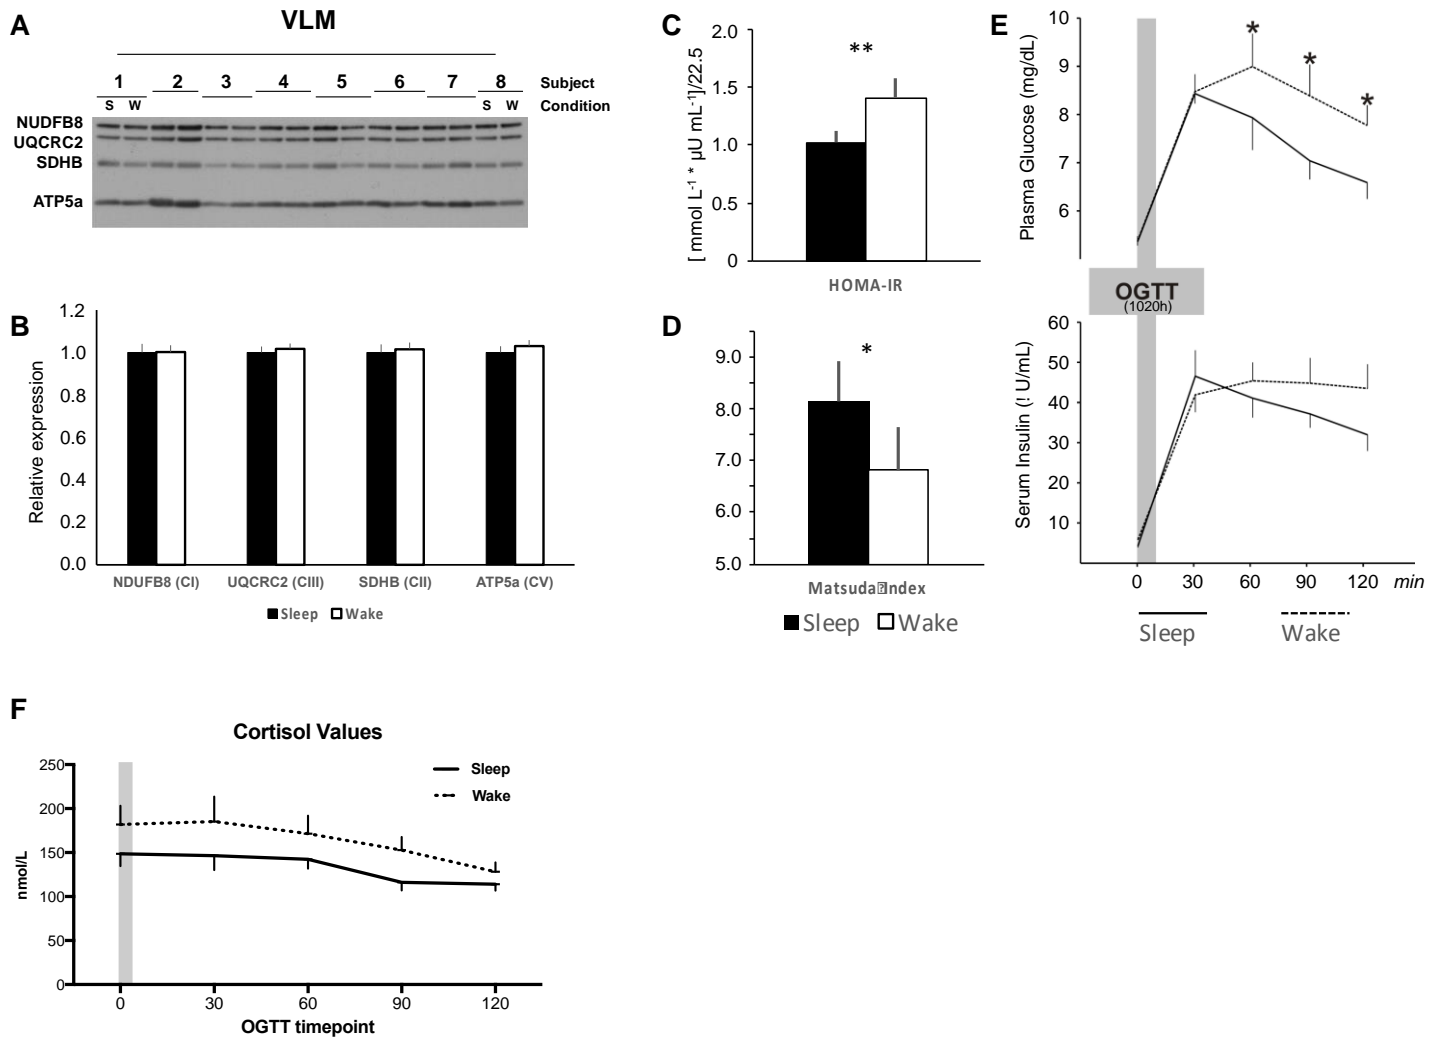

**Fig. S2. Insulin sensitivity is adversely affected, and cortisol levels are significantly elevated following acute sleep loss in healthy young men without changes to protein levels of mitochondrial complexes.** (A) Representative immunoblot and (B) quantification of mitochondrial complexes, after normal sleep (s) and sleep loss (*i.e.* overnight wakefulness; “w” / ”wake”) in vastus lateralis muscle (VLM; showing 8 representative pairs out of a total of 13 analyzed pairs). (C) Insulin sensitivity as assessed by HOMA-IR and the (D) Matsuda index (62) (paired two-sided t-tests), based on post-oral glucose tolerance test (OGTT) (E) glucose and insulin values (repeated measures ANOVA effects, glucose: Wake\*Time interaction P=0.002, Wake P=0.016, Time P=0.000; insulin: interaction P=0.235, Wake P=0.098, Time P=0.000). (F) Serum cortisol analyzed throughout the OGTT (repeated measures ANOVA, see main text; Wake\*Time interaction P>0.10). Western blots were normalized to loading control (shown in Fig. S5D). Line graphs: sleep, solid lines; sleep loss, dashed lines. Bar graphs: sleep, filled bars; sleep loss, white bars. ATP5a, F(1)F(0) ATP synthase; CI/CII/CIII/CV, mitochondrial complex 1/2/3/5; NUDFB8, NADH:ubiquinone oxidoreductase subunit B8; SDHB, Succinate Dehydrogenase complex iron sulfur subunit B; UQCRC2, Ubiquinol-Cytochrome C Reductase Core Protein II. Values shown as mean ± S.E.M, analysis by ANOVA or two-sided t-tests; ANOVA/biochemical analyses: n=15 pairs. \*, P<0.05; \*\*, P<0.01.

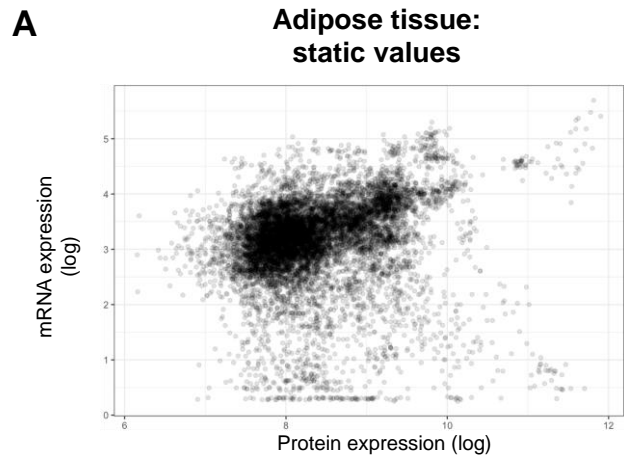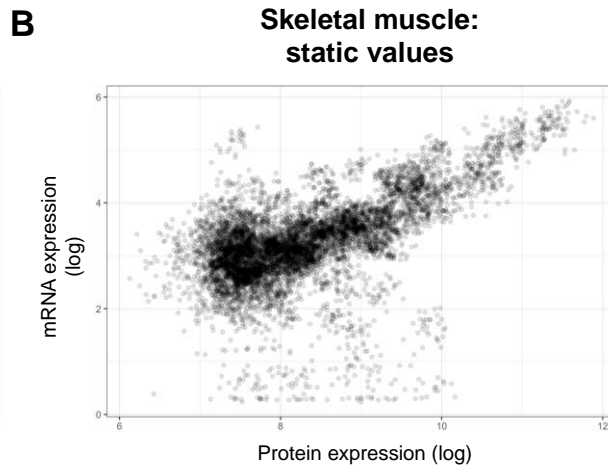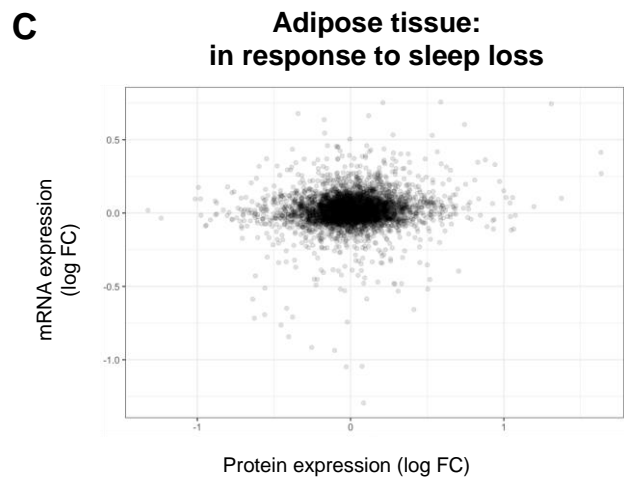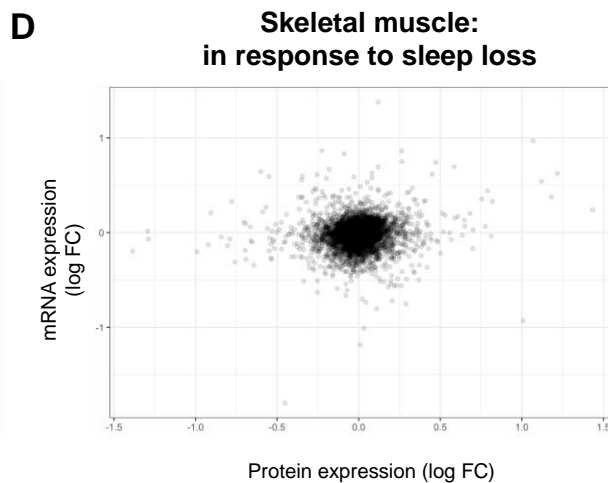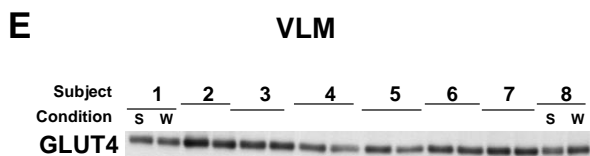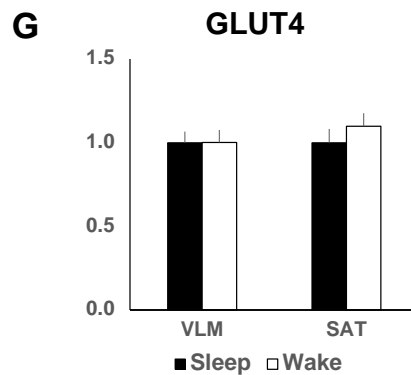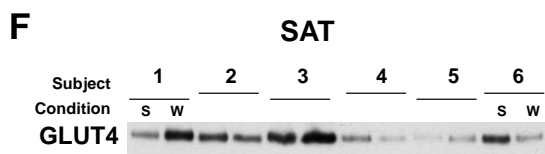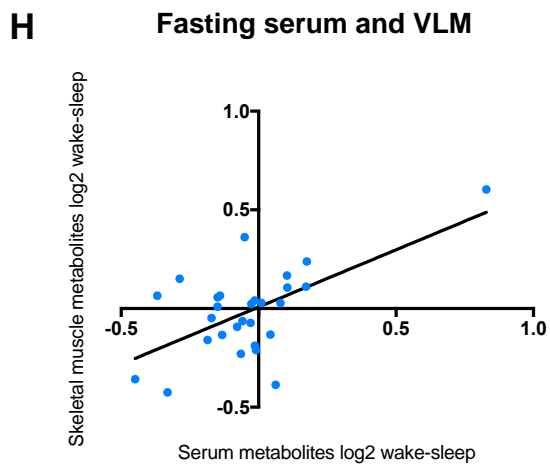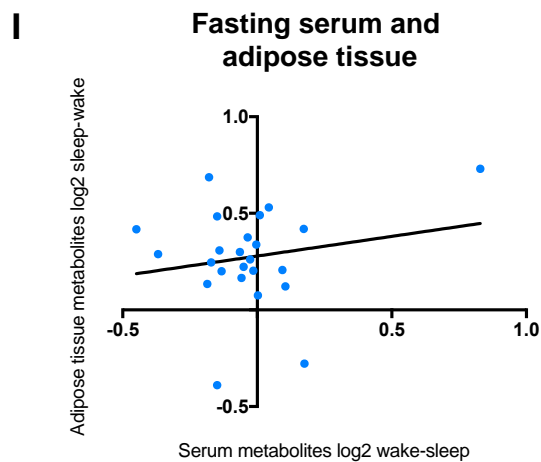

**Fig. S3. Gene expression and protein levels correlate at baseline but not in response to sleep loss in subcutaneous adipose tissue and skeletal muscle in humans.** Top panels show correlations in “static” samples, i.e. without considering the sleep loss-induced changes in levels of mRNA transcripts (from RNA-seq data) or protein levels (identified by mass spectrometry-based proteomic analyses), in (A) subcutaneous adipose tissue, and (B) skeletal muscle. In panels C-D, fold changes in mRNA transcript and protein levels (following sleep loss compared with sleep) were utilized to analyze correlations between gene expression and protein levels in (C) subcutaneous adipose tissue, and (D) in skeletal muscle (with n=15 pairs for each analysis) in response to sleep loss. (E-G) Immunoblot of GLUT4 in (E) *vastus lateralis* muscle (VLM; showing 8 representative pairs; out of 13 analyzed pairs) and (F) subcutaneous adipose tissue (SAT; showing 6 representative pairs; out of 11 analyzed pairs) after sleep (“s”) and sleep loss (“w”/wake); with quantification of all analyzed pairs in (G) ( $P > 0.10$  in two-sided t-tests). Values were normalized to loading control (shown in Fig. S4E-F). (H-I) Changes in metabolite levels ( $\log_2$  normalized; sleep loss compared with sleep) were utilized to analyze correlations between sleep loss-induced changes in metabolites identified by gas chromatography coupled to mass spectrometry (GCMS) in (H) fasting serum and skeletal muscle (VLM) samples as well as (I) between fasting serum and subcutaneous adipose tissue samples in response to acute sleep loss. GLUT4, glucose transporter 4. Values are shown as mean  $\pm$  S.E.M; protein abundance analyzed using two-sided t-tests.

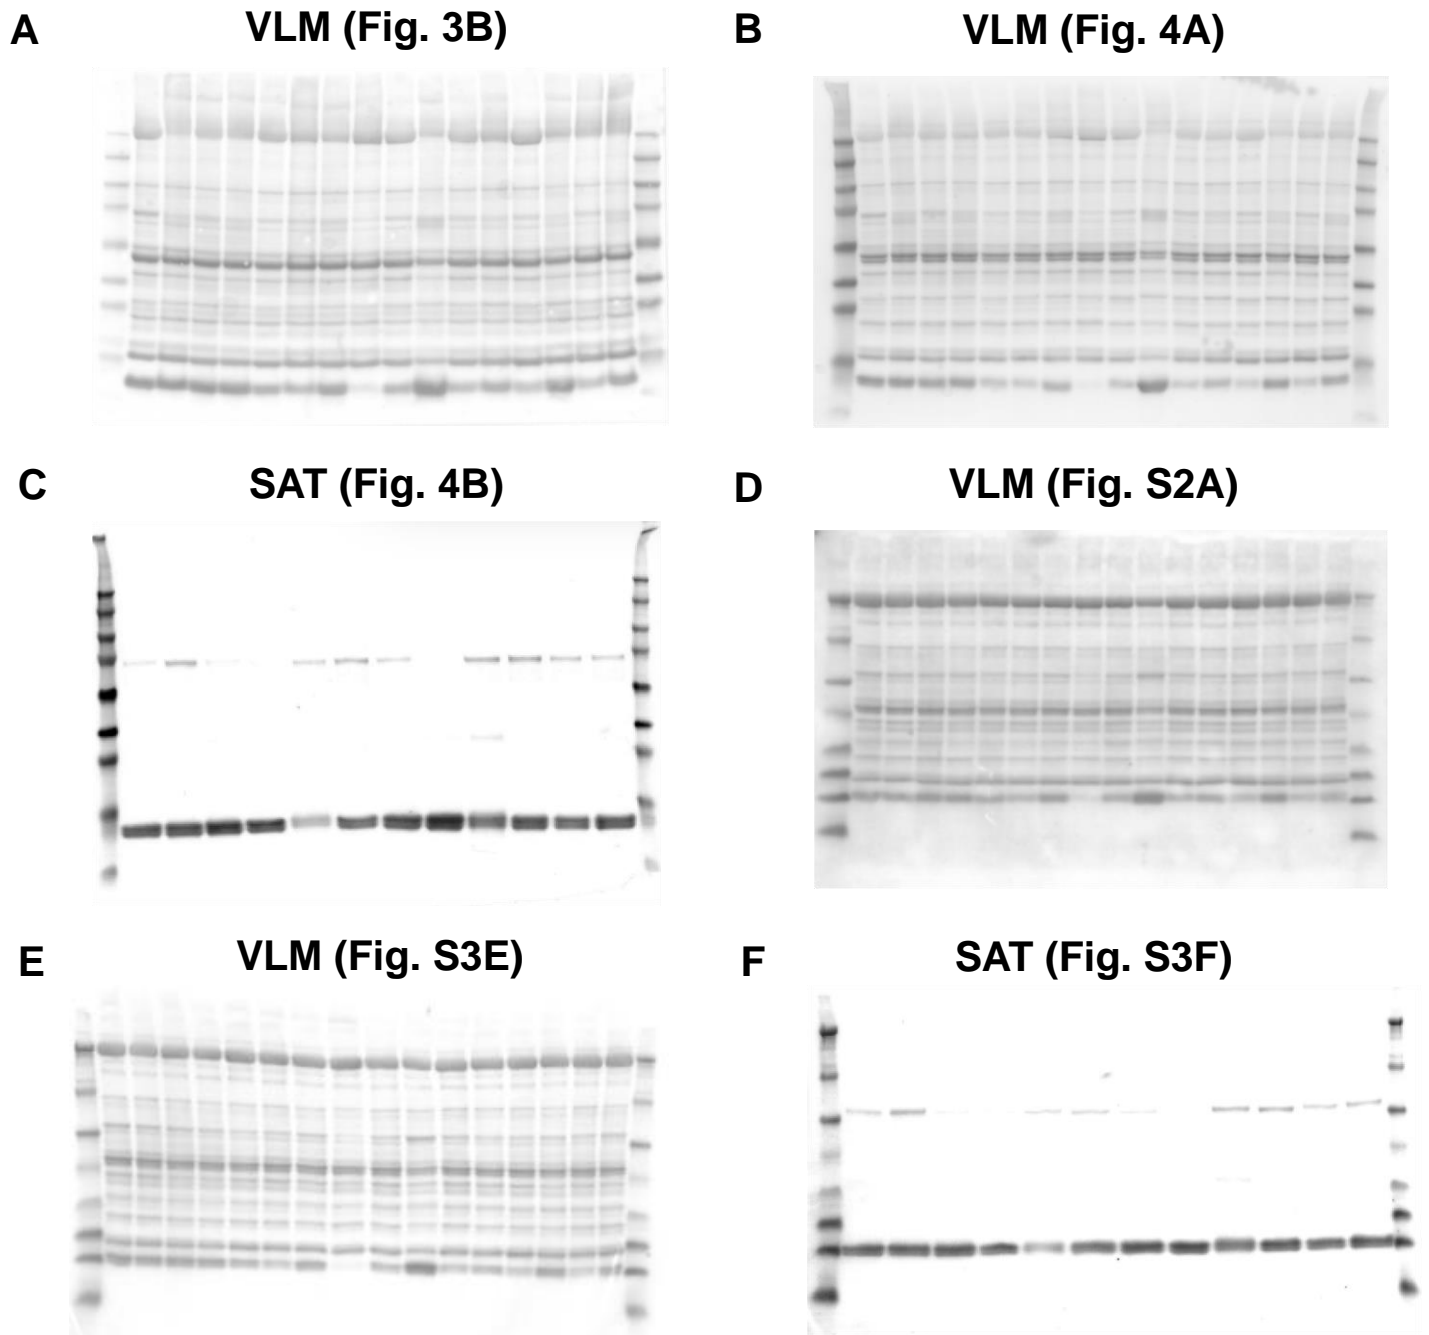

**Fig. S4. Loading controls for Western blots used throughout the manuscript.** Ponceau staining was used to visually verify protein loading and to quantitatively normalize western blots to total loaded protein content per sample(61). Figure shows Ponceau staining for western blots of (A) PFK-1 in *vastus lateralis* muscle (VLM) (see Fig. 3); BMAL1 in (B) VLM and in (C) subcutaneous adipose tissue (SAT) (see Fig. 4); (D) mitochondrial proteins (see Fig. S2); and (E-F) GLUT4 in VLM and SAT, respectively (see Fig. S3). BMAL1, brain and muscle Arnt-like protein-1; GLUT4, glucose transporter 4; PFK-1, phosphofructose kinase 1.

## Supplementary Tables

**Table S1. Data for the 15 participants that were included in the study.** Sleep data refers to the second (intervention) night of the sleep condition. Data shown as mean  $\pm$  S.E.M. BMI, body mass index; MEQ, morning-eveningness questionnaire; N1, stage 1; N2, stage 2; N3, stage 3 (slow wave sleep), REM, rapid eye movement.

| Parameter                           | Value                            |
|-------------------------------------|----------------------------------|
| <b>Age</b>                          | 22.3 $\pm$ 0.5 years             |
| <b>BMI</b>                          | 22.6 $\pm$ 0.5 kg/m <sup>2</sup> |
| <b>Waist circumference</b>          | 82.5 $\pm$ 1.8 cm                |
| <b>Hip circumference</b>            | 98.4 $\pm$ 1.1 cm                |
| <b>Waist-hip ratio</b>              | 0.84 $\pm$ 0.01                  |
| <b>MEQ score</b>                    | 48.7 $\pm$ 2.2                   |
| <b>Sleep data:</b>                  |                                  |
| • <b>Total sleep duration</b>       | 8.0 h $\pm$ 3 min                |
| ○ <b>% of total sleep duration:</b> |                                  |
| ▪ Awake:                            | 3.8 $\pm$ 0.5%                   |
| ▪ REM sleep:                        | 25 $\pm$ 1.2%                    |
| ▪ N1 sleep:                         | 2.1 $\pm$ 0.5%                   |
| ▪ N2 sleep:                         | 47.7 $\pm$ 1.2%                  |
| ▪ N3 sleep:                         | 21.7 $\pm$ 1.5%                  |

**Table S2. DMRs and enriched biological pathways based on methylation changes in subcutaneous adipose tissue in response to acute sleep loss.** (A) Showing hypermethylated and (B) hypomethylated DMRs, based on mean (Stouffer) FDR-adjusted P-value<0.05, in subcutaneous adipose tissue following sleep loss compared with normal sleep. For each DMR, the following are also listed: minimum FDR value; relation of analyzed DMRs to genes (e.g. near the transcription start site; TSS); chromosome (chr); start and end position; number of probes included in the DMR; width of the DMR; as well as the maximum and mean (absolute) change in beta (methylation) level. (C-E) Significant DMRs were utilized to identify enriched biological pathways in subcutaneous adipose tissue after sleep loss compared with normal sleep, showing pathways based on (C) all (regardless of directionality), (D) hypermethylated or (E) hypomethylated DMRs in subcutaneous adipose tissue. Listing GO term ID, name of the GO term, the utilized namespace, the total number of genes in each pathway ("N"), the number of annotated genes of a given pathway that were differentially methylated ("DE"), and the FDR-adjusted p value (q value) for the pathway. (F) Showing the 20 probes closest to reaching significance (FDR-adjusted) in skeletal muscle in response to sleep loss.

**Table S2A. Hypermethylated DMRs in subcutaneous adipose tissue after sleep loss compared with sleep.**

| Chr   | Start     | End       | Width | Nr of probes | Min FDR  | Stouffer | Max beta fc | Mean beta fc | Gene TSS        | Genomic feature |
|-------|-----------|-----------|-------|--------------|----------|----------|-------------|--------------|-----------------|-----------------|
| chr6  | 32077744  | 32078624  | 881   | 11           | 2.63E-17 | 6.17E-05 | 0.067       | 0.046        | <i>TNXB</i>     | Near TSS        |
| chr16 | 8806359   | 8807043   | 685   | 13           | 1.56E-14 | 3.99E-04 | 0.041       | 0.029        | <i>ABAT</i>     | Near TSS        |
| chr11 | 73356316  | 73357741  | 1426  | 11           | 7.88E-16 | 4.61E-04 | 0.062       | 0.033        | <i>PLEKHB1</i>  | Near TSS        |
| chr7  | 56160409  | 56161020  | 612   | 10           | 1.19E-10 | 5.39E-04 | 0.055       | 0.045        | <i>PHKG1</i>    | Near TSS        |
| chr10 | 95516788  | 95517895  | 1108  | 10           | 6.23E-19 | 6.77E-04 | 0.067       | 0.024        | <i>LG11</i>     | Near TSS        |
| chr6  | 106546704 | 106546824 | 121   | 5            | 2.63E-11 | 8.97E-04 | 0.053       | 0.045        | <i>PRDM1</i>    | Near TSS        |
| chr17 | 76975944  | 76976357  | 414   | 8            | 2.11E-11 | 9.18E-04 | 0.050       | 0.036        | <i>LGALS3BP</i> | Near TSS        |
| chr2  | 50201413  | 50201511  | 99    | 4            | 9.20E-12 | 9.70E-04 | 0.048       | 0.043        | <i>NRXN1</i>    | Near TSS        |
| chr8  | 38385808  | 38386476  | 669   | 6            | 1.84E-10 | 1.01E-03 | 0.062       | 0.027        | <i>C8orf86</i>  | Near TSS        |
| chr20 | 19866743  | 19867145  | 403   | 8            | 7.12E-09 | 1.20E-03 | 0.063       | 0.055        | <i>RIN2</i>     | Near TSS        |
| chr10 | 56560945  | 56561543  | 599   | 6            | 2.46E-13 | 1.70E-03 | 0.043       | 0.029        | <i>PCDH15</i>   | Near TSS        |
| chr4  | 24796689  | 24797176  | 488   | 8            | 1.06E-09 | 1.98E-03 | 0.073       | 0.047        | <i>SOD3</i>     | Near TSS        |
| chr11 | 86662968  | 86663418  | 451   | 6            | 2.11E-09 | 2.27E-03 | 0.059       | 0.049        | <i>FZD4</i>     | Near TSS        |
| chr17 | 57915665  | 57915773  | 109   | 4            | 9.21E-10 | 2.44E-03 | 0.052       | 0.042        | <i>VMP1</i>     | Near TSS        |
| chr17 | 79031091  | 79031712  | 622   | 7            | 1.01E-09 | 2.65E-03 | 0.049       | 0.034        | <i>BAIAP2</i>   | Near TSS        |
| chr5  | 35230343  | 35230935  | 593   | 5            | 1.91E-09 | 3.07E-03 | 0.050       | 0.027        | <i>PRLR</i>     | Near TSS        |
| chr12 | 91572142  | 91572276  | 135   | 4            | 1.13E-10 | 3.12E-03 | 0.040       | 0.037        | <i>DCN</i>      | Near TSS        |
| chr22 | 31002892  | 31003587  | 696   | 9            | 1.10E-11 | 3.43E-03 | 0.023       | 0.011        | <i>PES1</i>     | Near TSS        |



|       |           |           |      |    |          |          |       |       |                     |                   |
|-------|-----------|-----------|------|----|----------|----------|-------|-------|---------------------|-------------------|
| chr12 | 8834114   | 8834151   | 38   | 3  | 3.12E-10 | 3.48E-03 | 0.056 | 0.047 | <i>RIMKLB</i>       | Near TSS          |
| chr12 | 25801455  | 25801621  | 167  | 4  | 3.17E-08 | 3.70E-03 | 0.063 | 0.057 | <i>IFLTD1</i>       | Near TSS          |
| chr17 | 7791630   | 7792674   | 1045 | 8  | 7.60E-12 | 3.80E-03 | 0.044 | 0.025 | <i>CHD3</i>         | Near TSS          |
| chr7  | 114055074 | 114055210 | 137  | 6  | 3.23E-08 | 3.82E-03 | 0.055 | 0.048 | <i>FOXP2</i>        | Near TSS          |
| chr10 | 130830829 | 130831421 | 593  | 8  | 5.79E-10 | 3.95E-03 | 0.047 | 0.030 |                     | Intergenic region |
| chr4  | 154125208 | 154125720 | 513  | 9  | 9.56E-12 | 3.95E-03 | 0.067 | 0.041 | <i>TRIM2</i>        | Near TSS          |
| chr1  | 103573700 | 103574958 | 1259 | 10 | 3.41E-16 | 3.98E-03 | 0.043 | 0.017 | <i>COL11A1</i>      | Near TSS          |
| chr10 | 5227162   | 5227757   | 596  | 3  | 4.22E-10 | 4.03E-03 | 0.067 | 0.049 | <i>AKR1CL1</i>      | Near TSS          |
| chr3  | 194090132 | 194090730 | 599  | 6  | 5.40E-11 | 4.27E-03 | 0.035 | 0.012 | <i>LRRC15</i>       | Near TSS          |
| chr8  | 39171620  | 39172120  | 501  | 9  | 1.68E-11 | 4.71E-03 | 0.040 | 0.025 | <i>ADAM5</i>        | Near TSS          |
| chr17 | 42247565  | 42248358  | 794  | 8  | 1.18E-13 | 5.27E-03 | 0.047 | 0.027 | <i>ASB16</i>        | Near TSS          |
| chr11 | 122073211 | 122074433 | 1223 | 9  | 5.51E-16 | 5.52E-03 | 0.045 | 0.023 | <i>RP11-820L6.1</i> | Near TSS          |
| chr7  | 157462914 | 157463355 | 442  | 3  | 1.47E-10 | 5.55E-03 | 0.063 | 0.049 |                     | Intron            |
| chr1  | 165512980 | 165513716 | 737  | 8  | 4.18E-13 | 5.69E-03 | 0.036 | 0.018 | <i>LRRC52</i>       | Near TSS          |
| chr4  | 111557894 | 111558224 | 331  | 3  | 1.01E-09 | 5.82E-03 | 0.019 | 0.014 | <i>PITX2</i>        | Near TSS          |
| chr13 | 36944294  | 36944649  | 356  | 8  | 3.15E-11 | 5.91E-03 | 0.037 | 0.026 | <i>SPG20</i>        | Near TSS          |
| chr11 | 61716821  | 61717334  | 514  | 6  | 7.40E-11 | 5.96E-03 | 0.030 | 0.019 | <i>BEST1</i>        | Near TSS          |
| chr7  | 87936225  | 87936923  | 699  | 7  | 4.90E-10 | 6.63E-03 | 0.041 | 0.014 | <i>STEAP4</i>       | Near TSS          |
| chr3  | 196242197 | 196242423 | 227  | 3  | 1.38E-08 | 6.77E-03 | 0.049 | 0.000 | <i>SMCO1</i>        | Near TSS          |
| chr16 | 86376985  | 86377053  | 69   | 2  | 4.45E-11 | 7.14E-03 | 0.033 | 0.030 | <i>LINC00917</i>    | Near TSS          |
| chr6  | 27182908  | 27182976  | 69   | 3  | 4.65E-08 | 7.19E-03 | 0.031 | 0.024 | <i>RP11-209A2.1</i> | Near TSS          |
| chr2  | 108904812 | 108905468 | 657  | 4  | 7.02E-13 | 7.34E-03 | 0.054 | 0.036 | <i>SULT1C2</i>      | Near TSS          |
| chr3  | 122712138 | 122712271 | 134  | 3  | 3.67E-08 | 7.36E-03 | 0.041 | 0.036 | <i>SEMA5B</i>       | Near TSS          |
| chr6  | 133188277 | 133188565 | 289  | 3  | 3.01E-10 | 7.61E-03 | 0.038 | 0.035 | <i>HMGB1P13</i>     | Near TSS          |
| chr7  | 80267619  | 80267943  | 325  | 2  | 4.30E-11 | 7.77E-03 | 0.074 | 0.069 | <i>CD36</i>         | Near TSS          |
| chr12 | 47219626  | 47220092  | 467  | 12 | 1.29E-10 | 7.89E-03 | 0.034 | 0.022 | <i>SLC38A4</i>      | Near TSS          |
| chr7  | 28338584  | 28338985  | 402  | 6  | 8.89E-09 | 8.49E-03 | 0.037 | 0.017 | <i>CREB5</i>        | Near TSS          |
| chr13 | 31506324  | 31507139  | 816  | 10 | 1.60E-11 | 8.69E-03 | 0.048 | 0.029 | <i>TEX26-AS1</i>    | Near TSS          |
| chr1  | 156459986 | 156460747 | 762  | 5  | 4.07E-11 | 9.25E-03 | 0.023 | 0.012 | <i>MEF2D</i>        | Near TSS          |
| chr5  | 148442554 | 148442890 | 337  | 5  | 1.81E-08 | 9.29E-03 | 0.051 | 0.029 | <i>CTC-529P8.1</i>  | Near TSS          |
| chr7  | 21209165  | 21209509  | 345  | 3  | 1.62E-08 | 9.73E-03 | 0.038 | 0.022 |                     | Intergenic region |
| chr13 | 45492329  | 45492839  | 511  | 4  | 2.79E-09 | 9.99E-03 | 0.011 | 0.009 |                     | Intergenic region |
| chr1  | 156251280 | 156251456 | 177  | 3  | 1.89E-10 | 1.12E-02 | 0.036 | 0.031 | <i>SMG5</i>         | Near TSS          |

|       |           |           |      |    |          |          |        |       |                       |                   |
|-------|-----------|-----------|------|----|----------|----------|--------|-------|-----------------------|-------------------|
| chr3  | 165555103 | 165555160 | 58   | 2  | 2.37E-08 | 1.40E-02 | 0.063  | 0.045 | <i>BCHE</i>           | Near TSS          |
| chr10 | 93334974  | 93335196  | 223  | 4  | 2.73E-08 | 1.50E-02 | 0.051  | 0.037 |                       | Intergenic region |
| chr5  | 150019496 | 150019603 | 108  | 2  | 1.14E-10 | 1.52E-02 | 0.040  | 0.039 | <i>SYNPO</i>          | Near TSS          |
| chr11 | 41481358  | 41481655  | 298  | 5  | 9.06E-09 | 1.54E-02 | 0.022  | 0.014 | <i>LRRC4C</i>         | Near TSS          |
| chrX  | 66763009  | 66765122  | 2114 | 19 | 6.98E-14 | 1.55E-02 | 0.048  | 0.014 | <i>AR</i>             | Near TSS          |
| chr1  | 47656423  | 47656853  | 431  | 2  | 1.70E-08 | 1.59E-02 | 0.024  | 0.007 | <i>PDZK1IP1</i>       | Near TSS          |
| chr3  | 112012867 | 112013646 | 780  | 6  | 2.94E-10 | 1.63E-02 | -0.045 | 0.017 | <i>SLC9C1</i>         | Near TSS          |
| chr10 | 104535792 | 104536695 | 904  | 10 | 6.86E-10 | 1.66E-02 | 0.040  | 0.017 | <i>WBP1L</i>          | Near TSS          |
| chr14 | 67982430  | 67982456  | 27   | 2  | 3.51E-09 | 1.66E-02 | 0.033  | 0.031 | <i>TMEM229B</i>       | Near TSS          |
| chrX  | 67867130  | 67867448  | 319  | 8  | 3.44E-08 | 1.67E-02 | 0.076  | 0.040 | <i>STARD8</i>         | Near TSS          |
| chr2  | 219472218 | 219472410 | 193  | 2  | 2.26E-08 | 1.74E-02 | 0.059  | 0.054 | <i>PLCD4</i>          | Near TSS          |
| chr16 | 66995143  | 66995461  | 319  | 3  | 3.02E-08 | 1.74E-02 | 0.042  | 0.022 | <i>CES3</i>           | Near TSS          |
| chr9  | 116062223 | 116062240 | 18   | 2  | 9.12E-09 | 1.74E-02 | 0.054  | 0.046 | <i>RNF183</i>         | Near TSS          |
| chr6  | 31734147  | 31734580  | 434  | 10 | 3.66E-09 | 1.74E-02 | 0.041  | 0.031 | <i>SAPCD1-AS1</i>     | Near TSS          |
| chr6  | 30653167  | 30653799  | 633  | 12 | 2.83E-10 | 1.82E-02 | 0.033  | 0.018 | <i>PPP1R18</i>        | Near TSS          |
| chr6  | 32026299  | 32026891  | 593  | 9  | 6.90E-10 | 1.88E-02 | 0.036  | 0.023 |                       | Intron            |
| chr11 | 76432800  | 76433300  | 501  | 12 | 7.71E-15 | 1.98E-02 | 0.028  | 0.010 | <i>RP11-672A2.1</i>   | Near TSS          |
| chr8  | 49832881  | 49833279  | 399  | 2  | 1.29E-10 | 2.06E-02 | 0.051  | 0.045 | <i>SNAI2</i>          | Near TSS          |
| chr1  | 151137619 | 151138516 | 898  | 11 | 9.22E-11 | 2.18E-02 | 0.033  | 0.013 | <i>SCNM1</i>          | Near TSS          |
| chr6  | 130182053 | 130182620 | 568  | 7  | 4.78E-09 | 2.22E-02 | 0.053  | 0.024 | <i>TMEM244</i>        | Near TSS          |
| chr6  | 33157222  | 33157811  | 590  | 4  | 3.15E-11 | 2.31E-02 | 0.047  | 0.031 | <i>COL11A2</i>        | Near TSS          |
| chr19 | 45409440  | 45409713  | 274  | 2  | 1.02E-08 | 2.35E-02 | 0.021  | 0.016 | <i>APOE</i>           | Near TSS          |
| chr12 | 54411193  | 54411473  | 281  | 3  | 2.70E-10 | 2.45E-02 | 0.018  | 0.013 | <i>RP11-834C11.14</i> | Near TSS          |
| chr12 | 128866172 | 128866735 | 564  | 6  | 5.89E-11 | 2.47E-02 | 0.042  | 0.027 |                       | Intron            |
| chr12 | 4488749   | 4489221   | 473  | 6  | 1.23E-11 | 2.53E-02 | 0.040  | 0.010 | <i>FGF23</i>          | Near TSS          |
| chr15 | 64673455  | 64673618  | 164  | 3  | 5.23E-08 | 2.56E-02 | 0.017  | 0.015 | <i>KIAA0101</i>       | Near TSS          |
| chr3  | 112359935 | 112360446 | 512  | 2  | 6.56E-10 | 2.63E-02 | 0.043  | 0.034 | <i>CCDC80</i>         | Near TSS          |
| chr7  | 88425077  | 88425148  | 72   | 5  | 4.80E-08 | 2.67E-02 | 0.036  | 0.025 | <i>C7orf62</i>        | Near TSS          |
| chr7  | 27140942  | 27141139  | 198  | 4  | 3.36E-08 | 2.91E-02 | 0.058  | 0.044 | <i>HOXA2</i>          | Near TSS          |
| chr1  | 2448477   | 2448495   | 19   | 2  | 2.91E-08 | 3.06E-02 | 0.009  | 0.008 | <i>PANK4</i>          | Near TSS          |
| chr15 | 32162783  | 32163262  | 480  | 8  | 1.29E-10 | 3.08E-02 | -0.040 | 0.003 | <i>OTUD7A</i>         | Near TSS          |
| chr19 | 35606534  | 35606554  | 21   | 2  | 3.82E-08 | 3.10E-02 | 0.046  | 0.040 | <i>FXVD3</i>          | Near TSS          |
| chr22 | 31536431  | 31536585  | 155  | 5  | 7.02E-09 | 3.19E-02 | 0.033  | 0.023 | <i>PLA2G3</i>         | Near TSS          |

|       |          |          |     |    |          |          |       |       |                    |          |
|-------|----------|----------|-----|----|----------|----------|-------|-------|--------------------|----------|
| chr12 | 16757954 | 16758836 | 883 | 10 | 3.94E-15 | 3.70E-02 | 0.022 | 0.012 | <i>LMO3</i>        | Near TSS |
| chr6  | 32086425 | 32087190 | 766 | 13 | 1.62E-14 | 3.71E-02 | 0.037 | 0.017 | <i>ATF6B</i>       | Near TSS |
| chrX  | 85302489 | 85302864 | 376 | 5  | 6.27E-10 | 4.45E-02 | 0.056 | 0.020 | <i>CHM</i>         | Near TSS |
| chr4  | 3371520  | 3372206  | 687 | 7  | 8.47E-09 | 4.52E-02 | 0.048 | 0.026 | <i>RGS12</i>       | Near TSS |
| chr12 | 88536400 | 88536575 | 176 | 5  | 9.05E-13 | 4.52E-02 | 0.077 | 0.020 | <i>TMTC3</i>       | Near TSS |
| chr1  | 40723164 | 40723194 | 31  | 2  | 8.23E-09 | 4.62E-02 | 0.021 | 0.016 | <i>RP1-39G22.7</i> | Near TSS |
| chr11 | 8832817  | 8833095  | 279 | 6  | 3.67E-10 | 4.71E-02 | 0.048 | 0.024 | <i>ST5</i>         | Near TSS |
| chr6  | 30657882 | 30658612 | 731 | 8  | 6.81E-11 | 4.77E-02 | 0.032 | 0.013 | <i>NRM</i>         | Near TSS |

**Table S2B.** Hypomethylated DMRs in subcutaneous adipose tissue after sleep loss compared with sleep.

| Chr   | Start     | End       | Width | Nr of probes | Min FDR  | Stouffer | Max beta fc | Mean beta fc | Gene TSS             | Genomic feature      |
|-------|-----------|-----------|-------|--------------|----------|----------|-------------|--------------|----------------------|----------------------|
| chr11 | 2321770   | 2323272   | 1503  | 29           | 1.51E-14 | 7.35E-05 | -0.058      | -0.042       | <i>TSPAN32</i>       | Near TSS             |
| chr15 | 96886805  | 96888024  | 1220  | 11           | 4.73E-13 | 3.62E-04 | -0.045      | -0.030       |                      | Immediate downstream |
| chr20 | 3065343   | 3066014   | 672   | 8            | 3.22E-11 | 6.71E-04 | -0.056      | -0.037       | <i>AVP</i>           | Near TSS             |
| chr10 | 49892741  | 49893549  | 809   | 15           | 6.31E-11 | 8.25E-04 | -0.054      | -0.040       | <i>WDFY4</i>         | Near TSS             |
| chr19 | 46521467  | 46522575  | 1109  | 8            | 6.79E-13 | 1.77E-03 | -0.023      | -0.014       | <i>CCDC61</i>        | Near TSS             |
| chr15 | 25447222  | 25447799  | 578   | 3            | 4.29E-11 | 2.53E-03 | -0.026      | -0.023       | <i>SNORD115-18</i>   | Near TSS             |
| chr12 | 54784747  | 54785320  | 574   | 8            | 6.98E-10 | 3.30E-03 | -0.074      | -0.035       | <i>ZNF385A</i>       | Near TSS             |
| chr12 | 131589169 | 131589455 | 287   | 5            | 2.89E-09 | 3.53E-03 | -0.017      | 0.000        |                      | Exon                 |
| chr10 | 134024191 | 134024476 | 286   | 3            | 2.50E-11 | 4.41E-03 | -0.017      | -0.014       |                      | Immediate downstream |
| chr8  | 144408506 | 144408955 | 450   | 5            | 2.13E-08 | 4.77E-03 | -0.049      | -0.029       | <i>TOP1MT</i>        | Near TSS             |
| chr1  | 64669125  | 64669599  | 475   | 9            | 1.46E-11 | 5.56E-03 | -0.026      | -0.015       | <i>UBE2U</i>         | Near TSS             |
| chr18 | 19756877  | 19757468  | 592   | 4            | 1.63E-09 | 5.99E-03 | -0.052      | -0.039       | <i>RP11-627G18.2</i> | Near TSS             |
| chr20 | 57463900  | 57464571  | 672   | 9            | 7.12E-09 | 6.89E-03 | -0.026      | -0.018       | <i>GNAS</i>          | Near TSS             |
| chr6  | 116447667 | 116448231 | 565   | 2            | 2.22E-11 | 7.19E-03 | -0.034      | -0.029       | <i>COL10A1</i>       | Near TSS             |
| chr22 | 24822802  | 24823554  | 753   | 10           | 5.43E-12 | 7.42E-03 | -0.060      | -0.032       | <i>ADORA2A</i>       | Near TSS             |
| chr7  | 1267987   | 1268188   | 202   | 2            | 1.88E-11 | 8.37E-03 | -0.061      | -0.058       | <i>UNCX</i>          | Near TSS             |
| chr4  | 4864110   | 4864902   | 793   | 12           | 6.24E-10 | 9.27E-03 | -0.050      | -0.028       | <i>MSX1</i>          | Near TSS             |
| chr16 | 87511403  | 87511500  | 98    | 2            | 2.25E-08 | 1.03E-02 | -0.055      | -0.039       |                      | Intron               |
| chr5  | 666524    | 666707    | 184   | 2            | 3.10E-08 | 1.04E-02 | -0.021      | -0.017       | <i>AC026740.1</i>    | Near TSS             |

|       |           |           |      |    |          |          |        |        |                     |                      |
|-------|-----------|-----------|------|----|----------|----------|--------|--------|---------------------|----------------------|
| chr7  | 2128263   | 2128505   | 243  | 2  | 2.29E-08 | 1.07E-02 | -0.025 | -0.023 | <i>MAD1L1</i>       | Near TSS             |
| chr3  | 12858887  | 12858926  | 40   | 2  | 3.98E-08 | 1.10E-02 | -0.041 | -0.038 |                     | Exon                 |
| chr11 | 68611016  | 68611328  | 313  | 3  | 1.20E-08 | 1.18E-02 | -0.036 | -0.025 | <i>CPT1A</i>        | Near TSS             |
| chr11 | 66822853  | 66822904  | 52   | 2  | 2.58E-10 | 1.18E-02 | -0.025 | -0.022 | <i>RHOD</i>         | Near TSS             |
| chr6  | 31760426  | 31761076  | 651  | 12 | 2.01E-09 | 1.18E-02 | -0.036 | -0.018 | <i>VAR5</i>         | Near TSS             |
| chr11 | 45721162  | 45721257  | 96   | 2  | 1.55E-09 | 1.22E-02 | -0.027 | -0.023 |                     | Intergenic region    |
| chr16 | 56388908  | 56389029  | 122  | 3  | 3.16E-09 | 1.34E-02 | -0.025 | -0.023 | <i>RP11-441F2.5</i> | Near TSS             |
| chr13 | 45993412  | 45993749  | 338  | 2  | 1.54E-10 | 1.40E-02 | -0.028 | -0.022 | <i>SLC25A30</i>     | Near TSS             |
| chr20 | 36157577  | 36157764  | 188  | 5  | 8.54E-09 | 1.42E-02 | -0.021 | -0.017 | <i>PPIAP3</i>       | Near TSS             |
| chr18 | 9885797   | 9885809   | 13   | 2  | 2.81E-08 | 1.44E-02 | -0.015 | -0.014 | <i>TXNDC2</i>       | Near TSS             |
| chrX  | 21874093  | 21874808  | 716  | 6  | 2.38E-11 | 1.49E-02 | -0.026 | -0.018 | <i>YY2</i>          | Near TSS             |
| chr2  | 177027075 | 177028162 | 1088 | 8  | 7.67E-09 | 1.65E-02 | -0.050 | -0.035 | <i>HOXD3</i>        | Near TSS             |
| chr4  | 3416849   | 3416881   | 33   | 2  | 1.97E-10 | 1.78E-02 | -0.059 | -0.052 | <i>RGS12</i>        | Near TSS             |
| chr6  | 30297174  | 30297941  | 768  | 12 | 5.78E-10 | 1.81E-02 | -0.052 | -0.036 | <i>TRIM39</i>       | Near TSS             |
| chr13 | 114888999 | 114889227 | 229  | 3  | 3.95E-09 | 1.82E-02 | -0.025 | -0.018 |                     | Intron               |
| chr17 | 38658717  | 38659139  | 423  | 3  | 8.13E-12 | 2.06E-02 | -0.023 | -0.012 | <i>TNS4</i>         | Near TSS             |
| chr15 | 28051072  | 28051262  | 191  | 2  | 2.19E-09 | 2.18E-02 | -0.022 | -0.018 |                     | Intron               |
| chr17 | 76128906  | 76129533  | 628  | 5  | 1.51E-10 | 2.25E-02 | -0.045 | -0.024 | <i>TMC6</i>         | Near TSS             |
| chr6  | 35704822  | 35704928  | 107  | 2  | 1.00E-09 | 2.38E-02 | -0.023 | -0.018 | <i>ARMC12</i>       | Near TSS             |
| chr4  | 186944909 | 186945339 | 431  | 5  | 1.53E-09 | 2.51E-02 | -0.032 | -0.012 | <i>RNU4-64P</i>     | Near TSS             |
| chr1  | 231155449 | 231156359 | 911  | 13 | 1.04E-09 | 2.54E-02 | 0.053  | -0.003 | <i>MIR1182</i>      | Near TSS             |
| chr9  | 133885009 | 133885058 | 50   | 2  | 9.23E-09 | 2.59E-02 | -0.026 | 0.000  | <i>LAMC3</i>        | Near TSS             |
| chr6  | 30552010  | 30552133  | 124  | 4  | 1.16E-08 | 2.61E-02 | -0.021 | -0.008 | <i>MIR877</i>       | Near TSS             |
| chr16 | 129454    | 129562    | 109  | 2  | 2.63E-08 | 2.61E-02 | -0.036 | -0.030 | <i>MPG</i>          | Near TSS             |
| chr4  | 7436199   | 7436259   | 61   | 2  | 2.18E-09 | 2.64E-02 | -0.023 | -0.019 | <i>PSAPL1</i>       | Near TSS             |
| chr6  | 32062914  | 32065211  | 2298 | 57 | 9.76E-17 | 2.71E-02 | -0.030 | -0.013 |                     | Immediate downstream |
| chr5  | 1501109   | 1501670   | 562  | 3  | 4.77E-12 | 2.84E-02 | -0.023 | -0.016 |                     | Exon                 |
| chr10 | 131567498 | 131567534 | 37   | 2  | 3.98E-08 | 2.94E-02 | -0.038 | -0.028 | <i>RP11-109A6.3</i> | Near TSS             |
| chr4  | 68928981  | 68929413  | 433  | 4  | 4.79E-11 | 2.99E-02 | -0.042 | -0.018 | <i>SYT14L</i>       | Near TSS             |
| chr12 | 115133735 | 115134496 | 762  | 8  | 5.31E-09 | 3.49E-02 | -0.036 | -0.031 |                     | Intergenic region    |
| chr17 | 1961440   | 1961778   | 339  | 3  | 1.36E-08 | 3.64E-02 | -0.026 | -0.022 | <i>HIC1</i>         | Near TSS             |
| chr1  | 92952897  | 92953279  | 383  | 4  | 3.16E-09 | 3.82E-02 | -0.075 | -0.040 | <i>GFI1</i>         | Near TSS             |

|       |           |           |     |    |          |          |        |        |                      |                      |
|-------|-----------|-----------|-----|----|----------|----------|--------|--------|----------------------|----------------------|
| chr4  | 4860190   | 4860698   | 509 | 10 | 3.92E-09 | 3.92E-02 | -0.038 | -0.026 | <i>MSX1</i>          | Near TSS             |
| chr20 | 57582894  | 57583188  | 295 | 8  | 2.53E-08 | 4.25E-02 | -0.071 | -0.042 | <i>CTSZ</i>          | Near TSS             |
| chr11 | 2183505   | 2183864   | 360 | 5  | 1.59E-08 | 4.44E-02 | -0.024 | -0.015 | <i>INS</i>           | Near TSS             |
| chr5  | 93905343  | 93905482  | 140 | 4  | 2.32E-08 | 4.61E-02 | -0.022 | -0.016 | <i>RP11-461G12.2</i> | Near TSS             |
| chr12 | 131493585 | 131493891 | 307 | 2  | 5.35E-10 | 4.86E-02 | -0.023 | -0.015 |                      | Immediate downstream |

**Table S2C.** Enriched biological pathways based on *all* (hyper- and hypomethylated) significant DMRs in subcutaneous adipose tissue after sleep loss compared with sleep.

| GO term ID | Term name                                | Namespace | N    | DE | q value   |
|------------|------------------------------------------|-----------|------|----|-----------|
| GO:0061448 | connective tissue development            | BP        | 235  | 10 | 0.0000003 |
| GO:0051216 | cartilage development                    | BP        | 180  | 9  | 0.0000003 |
| GO:0050877 | nervous system process                   | BP        | 1217 | 21 | 0.0000006 |
| GO:0023051 | regulation of signaling                  | BP        | 3363 | 36 | 0.0000043 |
| GO:0050806 | positive regulation of synaptic trans... | BP        | 134  | 7  | 0.0000051 |
| GO:0001501 | skeletal system development              | BP        | 486  | 12 | 0.0000061 |
| GO:0010646 | regulation of cell communication         | BP        | 3314 | 35 | 0.0000085 |
| GO:0003008 | system process                           | BP        | 1953 | 25 | 0.0000102 |
| GO:0022610 | biological adhesion                      | BP        | 1339 | 20 | 0.0000104 |
| GO:0043516 | regulation of DNA damage response, si... | BP        | 30   | 4  | 0.0000149 |
| GO:0050804 | modulation of chemical synaptic trans... | BP        | 306  | 9  | 0.0000243 |
| GO:0009653 | anatomical structure morphogenesis       | BP        | 2470 | 28 | 0.0000258 |
| GO:0007610 | behavior                                 | BP        | 572  | 12 | 0.0000307 |
| GO:0007155 | cell adhesion                            | BP        | 1332 | 19 | 0.0000335 |
| GO:0043517 | positive regulation of DNA damage res... | BP        | 14   | 3  | 0.000043  |
| GO:0030154 | cell differentiation                     | BP        | 3908 | 37 | 0.0000508 |
| GO:0051957 | positive regulation of amino acid tra... | BP        | 15   | 3  | 0.0000535 |
| GO:1903793 | positive regulation of anion transpor... | BP        | 42   | 4  | 0.000058  |
| GO:0050890 | cognition                                | BP        | 270  | 8  | 0.0000663 |
| GO:0007267 | cell-cell signaling                      | BP        | 1561 | 20 | 0.0000911 |
| GO:0048705 | skeletal system morphogenesis            | BP        | 210  | 7  | 0.0000927 |
| GO:0035556 | intracellular signal transduction        | BP        | 2659 | 28 | 0.0000962 |
| GO:0048856 | anatomical structure development         | BP        | 5518 | 46 | 0.0001021 |

|            |                                          |    |      |    |           |
|------------|------------------------------------------|----|------|----|-----------|
| GO:0009887 | animal organ morphogenesis               | BP | 985  | 15 | 0.0001208 |
| GO:0048869 | cellular developmental process           | BP | 4078 | 37 | 0.0001274 |
| GO:0042359 | vitamin D metabolic process              | BP | 20   | 3  | 0.0001316 |
| GO:0032502 | developmental process                    | BP | 5921 | 48 | 0.0001333 |
| GO:0046942 | carboxylic acid transport                | BP | 303  | 8  | 0.0001472 |
| GO:0010647 | positive regulation of cell communica... | BP | 1619 | 20 | 0.0001493 |
| GO:1901798 | positive regulation of signal transdu... | BP | 21   | 3  | 0.000153  |
| GO:0033993 | response to lipid                        | BP | 893  | 14 | 0.0001532 |
| GO:0009966 | regulation of signal transduction        | BP | 3031 | 30 | 0.000156  |
| GO:0023056 | positive regulation of signaling         | BP | 1625 | 20 | 0.0001569 |
| GO:0050896 | response to stimulus                     | BP | 8322 | 61 | 0.0001608 |
| GO:0032989 | cellular component morphogenesis         | BP | 1018 | 15 | 0.0001731 |
| GO:0015849 | organic acid transport                   | BP | 311  | 8  | 0.0001759 |
| GO:0010894 | negative regulation of steroid biosyn... | BP | 22   | 3  | 0.0001765 |
| GO:1901700 | response to oxygen-containing compoun... | BP | 1512 | 19 | 0.0001797 |
| GO:0045600 | positive regulation of fat cell diffe... | BP | 56   | 4  | 0.0001802 |
| GO:0006820 | anion transport                          | BP | 587  | 11 | 0.0001804 |
| GO:0044070 | regulation of anion transport            | BP | 105  | 5  | 0.0001882 |
| GO:0023052 | signaling                                | BP | 6178 | 49 | 0.0001902 |
| GO:0045595 | regulation of cell differentiation       | BP | 1649 | 20 | 0.0001908 |
| GO:0010648 | negative regulation of cell communica... | BP | 1274 | 17 | 0.0002032 |
| GO:0000902 | cell morphogenesis                       | BP | 921  | 14 | 0.0002107 |
| GO:0023057 | negative regulation of signaling         | BP | 1278 | 17 | 0.0002109 |
| GO:0050866 | negative regulation of cell activatio... | BP | 169  | 6  | 0.0002124 |
| GO:0045939 | negative regulation of steroid metabo... | BP | 24   | 3  | 0.0002303 |
| GO:0048468 | cell development                         | BP | 1944 | 22 | 0.0002342 |
| GO:0015909 | long-chain fatty acid transport          | BP | 62   | 4  | 0.0002675 |
| GO:0007275 | multicellular organism development       | BP | 5056 | 42 | 0.0002721 |
| GO:0001958 | endochondral ossification                | BP | 26   | 3  | 0.0002937 |
| GO:0036075 | replacement ossification                 | BP | 26   | 3  | 0.0002937 |
| GO:0060348 | bone development                         | BP | 183  | 6  | 0.0003257 |
| GO:0048585 | negative regulation of response to st... | BP | 1458 | 18 | 0.0003361 |
| GO:0050795 | regulation of behavior                   | BP | 66   | 4  | 0.0003403 |

|            |                                          |    |      |    |           |
|------------|------------------------------------------|----|------|----|-----------|
| GO:0051955 | regulation of amino acid transport       | BP | 28   | 3  | 0.0003673 |
| GO:0022008 | neurogenesis                             | BP | 1472 | 18 | 0.000377  |
| GO:0035116 | embryonic hindlimb morphogenesis         | BP | 29   | 3  | 0.0004082 |
| GO:0032892 | positive regulation of organic acid t... | BP | 29   | 3  | 0.0004082 |
| GO:0032501 | multicellular organismal process         | BP | 7084 | 53 | 0.0004088 |
| GO:0009967 | positive regulation of signal transdu... | BP | 1483 | 18 | 0.0004121 |
| GO:0007626 | locomotory behavior                      | BP | 192  | 6  | 0.0004206 |
| GO:0007154 | cell communication                       | BP | 6196 | 48 | 0.0004223 |
| GO:0015711 | organic anion transport                  | BP | 449  | 9  | 0.0004391 |
| GO:0032102 | negative regulation of response to ex... | BP | 272  | 7  | 0.00045   |
| GO:0019216 | regulation of lipid metabolic process    | BP | 358  | 8  | 0.000452  |
| GO:0000904 | cell morphogenesis involved in differ... | BP | 658  | 11 | 0.0004759 |
| GO:1902531 | regulation of intracellular signal tr... | BP | 1772 | 20 | 0.0004869 |
| GO:0051954 | positive regulation of amine transpor... | BP | 31   | 3  | 0.0004985 |
| GO:0030182 | neuron differentiation                   | BP | 1250 | 16 | 0.0005025 |
| GO:0048699 | generation of neurons                    | BP | 1378 | 17 | 0.0005042 |
| GO:0007399 | nervous system development               | BP | 2211 | 23 | 0.000553  |
| GO:0009605 | response to external stimulus            | BP | 2071 | 22 | 0.000562  |
| GO:0050793 | regulation of developmental process      | BP | 2360 | 24 | 0.0005686 |
| GO:0050953 | sensory perception of light stimulus     | BP | 206  | 6  | 0.0006096 |
| GO:0045833 | negative regulation of lipid metaboli... | BP | 78   | 4  | 0.0006432 |
| GO:2001233 | regulation of apoptotic signaling pat... | BP | 378  | 8  | 0.0006457 |
| GO:0016049 | cell growth                              | BP | 474  | 9  | 0.0006474 |
| GO:0050878 | regulation of body fluid levels          | BP | 480  | 9  | 0.0007078 |
| GO:0009968 | negative regulation of signal transdu... | BP | 1169 | 15 | 0.0007434 |
| GO:0046879 | hormone secretion                        | BP | 298  | 7  | 0.000772  |
| GO:0007605 | sensory perception of sound              | BP | 143  | 5  | 0.0007783 |
| GO:0035137 | hindlimb morphogenesis                   | BP | 37   | 3  | 0.0008431 |
| GO:0040007 | growth                                   | BP | 937  | 13 | 0.0008434 |
| GO:0051716 | cellular response to stimulus            | BP | 6947 | 51 | 0.0009454 |
| GO:0051341 | regulation of oxidoreductase activity    | BP | 87   | 4  | 0.0009696 |
| GO:0009914 | hormone transport                        | BP | 310  | 7  | 0.0009718 |
| GO:1902532 | negative regulation of intracellular ... | BP | 503  | 9  | 0.000984  |

|            |                                          |    |       |    |           |
|------------|------------------------------------------|----|-------|----|-----------|
| GO:0060349 | bone morphogenesis                       | BP | 88    | 4  | 0.0010119 |
| GO:0015718 | monocarboxylic acid transport            | BP | 153   | 5  | 0.0010538 |
| GO:0008150 | biological_process                       | BP | 16519 | 97 | 0.001054  |
| GO:0015908 | fatty acid transport                     | BP | 90    | 4  | 0.0011003 |
| GO:0033273 | response to vitamin                      | BP | 90    | 4  | 0.0011003 |
| GO:0048167 | regulation of synaptic plasticity        | BP | 155   | 5  | 0.0011166 |
| GO:0055081 | anion homeostasis                        | BP | 41    | 3  | 0.00114   |
| GO:0007611 | learning or memory                       | BP | 233   | 6  | 0.0011547 |
| GO:0009888 | tissue development                       | BP | 1901  | 20 | 0.00117   |
| GO:0022414 | reproductive process                     | BP | 1356  | 16 | 0.0011958 |
| GO:0000003 | reproduction                             | BP | 1357  | 16 | 0.001205  |
| GO:0023061 | signal release                           | BP | 417   | 8  | 0.0012148 |
| GO:0006775 | fat-soluble vitamin metabolic process    | BP | 42    | 3  | 0.0012232 |
| GO:0098869 | cellular oxidant detoxification          | BP | 93    | 4  | 0.0012429 |
| GO:0051094 | positive regulation of developmental ... | BP | 1233  | 15 | 0.0012712 |
| GO:0050954 | sensory perception of mechanical stim... | BP | 160   | 5  | 0.0012857 |
| GO:0048732 | gland development                        | BP | 421   | 8  | 0.0012906 |
| GO:0030199 | collagen fibril organization             | BP | 43    | 3  | 0.0013102 |
| GO:0033574 | response to testosterone                 | BP | 43    | 3  | 0.0013102 |
| GO:0007599 | hemostasis                               | BP | 328   | 7  | 0.0013455 |
| GO:0030198 | extracellular matrix organization        | BP | 329   | 7  | 0.0013691 |
| GO:0043062 | extracellular structure organization     | BP | 330   | 7  | 0.0013931 |
| GO:0050905 | neuromuscular process                    | BP | 96    | 4  | 0.001398  |
| GO:0051353 | positive regulation of oxidoreductase... | BP | 44    | 3  | 0.0014009 |
| GO:1990748 | cellular detoxification                  | BP | 97    | 4  | 0.0014525 |
| GO:0007600 | sensory perception                       | BP | 873   | 12 | 0.0014538 |
| GO:0046890 | regulation of lipid biosynthetic proc... | BP | 166   | 5  | 0.0015128 |
| GO:1901701 | cellular response to oxygen-containin... | BP | 1005  | 13 | 0.0015869 |
| GO:0045597 | positive regulation of cell different... | BP | 884   | 12 | 0.0016152 |
| GO:0098754 | detoxification                           | BP | 101   | 4  | 0.0016856 |
| GO:0035094 | response to nicotine                     | BP | 47    | 3  | 0.0016966 |
| GO:0046883 | regulation of hormone secretion          | BP | 252   | 6  | 0.0017205 |
| GO:0007165 | signal transduction                      | BP | 5695  | 43 | 0.0018018 |



|            |                                          |    |      |    |           |
|------------|------------------------------------------|----|------|----|-----------|
| GO:0051055 | negative regulation of lipid biosynth... | BP | 48   | 3  | 0.0018031 |
| GO:1901796 | regulation of signal transduction by ... | BP | 175  | 5  | 0.0019071 |
| GO:0048731 | system development                       | BP | 4505 | 36 | 0.0019117 |
| GO:0032890 | regulation of organic acid transport     | BP | 49   | 3  | 0.0019138 |
| GO:0048522 | positive regulation of cellular proce... | BP | 4846 | 38 | 0.0019245 |
| GO:0097237 | cellular response to toxic substance     | BP | 105  | 4  | 0.0019435 |
| GO:0098609 | cell-cell adhesion                       | BP | 784  | 11 | 0.0019598 |
| GO:0071396 | cellular response to lipid               | BP | 558  | 9  | 0.0020083 |
| GO:0060350 | endochondral bone morphogenesis          | BP | 50   | 3  | 0.0020285 |
| GO:0060425 | lung morphogenesis                       | BP | 50   | 3  | 0.0020285 |
| GO:0046426 | negative regulation of JAK-STAT casca... | BP | 50   | 3  | 0.0020285 |
| GO:1904893 | negative regulation of STAT cascade      | BP | 50   | 3  | 0.0020285 |
| GO:0030330 | DNA damage response, signal transduct... | BP | 109  | 4  | 0.0022275 |
| GO:0019935 | cyclic-nucleotide-mediated signaling     | BP | 112  | 4  | 0.0024584 |
| GO:0070527 | platelet aggregation                     | BP | 54   | 3  | 0.0025301 |
| GO:0032768 | regulation of monooxygenase activity     | BP | 54   | 3  | 0.0025301 |
| GO:0099565 | chemical synaptic transmission, posts... | BP | 114  | 4  | 0.0026212 |
| GO:0034381 | plasma lipoprotein particle clearance    | BP | 55   | 3  | 0.0026664 |
| GO:0046717 | acid secretion                           | BP | 115  | 4  | 0.0027053 |
| GO:0097190 | apoptotic signaling pathway              | BP | 584  | 9  | 0.0027252 |
| GO:1905114 | cell surface receptor signaling pathw... | BP | 585  | 9  | 0.0027563 |
| GO:0045598 | regulation of fat cell differentiatio... | BP | 116  | 4  | 0.0027912 |
| GO:0048812 | neuron projection morphogenesis          | BP | 587  | 9  | 0.0028195 |
| GO:0010033 | response to organic substance            | BP | 2965 | 26 | 0.0028457 |
| GO:0001763 | morphogenesis of a branching structur... | BP | 193  | 5  | 0.0029142 |
| GO:0010817 | regulation of hormone levels             | BP | 481  | 8  | 0.0029528 |
| GO:0032101 | regulation of response to external st... | BP | 707  | 10 | 0.0029647 |
| GO:0001558 | regulation of cell growth                | BP | 380  | 7  | 0.0030769 |
| GO:0032963 | collagen metabolic process               | BP | 120  | 4  | 0.0031537 |
| GO:0006725 | cellular aromatic compound metabolic ... | BP | 5857 | 43 | 0.0031915 |
| GO:0048706 | embryonic skeletal system development    | BP | 121  | 4  | 0.0032491 |
| GO:0098916 | anterograde trans-synaptic signaling     | BP | 600  | 9  | 0.0032587 |
| GO:0007268 | chemical synaptic transmission           | BP | 600  | 9  | 0.0032587 |

|            |                                          |    |       |    |           |
|------------|------------------------------------------|----|-------|----|-----------|
| GO:0120039 | plasma membrane bounded cell projecti... | BP | 601   | 9  | 0.0032946 |
| GO:0099536 | synaptic signaling                       | BP | 602   | 9  | 0.0033308 |
| GO:0099537 | trans-synaptic signaling                 | BP | 602   | 9  | 0.0033308 |
| GO:0048858 | cell projection morphogenesis            | BP | 604   | 9  | 0.0034042 |
| GO:0097755 | positive regulation of blood vessel d... | BP | 60    | 3  | 0.0034154 |
| GO:0045834 | positive regulation of lipid metaboli... | BP | 123   | 4  | 0.0034457 |
| GO:0042770 | signal transduction in response to DN... | BP | 123   | 4  | 0.0034457 |
| GO:0034654 | nucleobase-containing compound biosyn... | BP | 4151  | 33 | 0.0034632 |
| GO:0090304 | nucleic acid metabolic process           | BP | 5008  | 38 | 0.0035241 |
| GO:0007601 | visual perception                        | BP | 202   | 5  | 0.003541  |
| GO:0009581 | detection of external stimulus           | BP | 124   | 4  | 0.003547  |
| GO:1901360 | organic cyclic compound metabolic pro... | BP | 6069  | 44 | 0.003574  |
| GO:0044259 | multicellular organismal macromolecul... | BP | 125   | 4  | 0.0036503 |
| GO:0022603 | regulation of anatomical structure mo... | BP | 982   | 12 | 0.0038164 |
| GO:0008152 | metabolic process                        | BP | 11048 | 70 | 0.0038423 |
| GO:0009582 | detection of abiotic stimulus            | BP | 127   | 4  | 0.003863  |
| GO:0010977 | negative regulation of neuron project... | BP | 127   | 4  | 0.003863  |
| GO:0045444 | fat cell differentiation                 | BP | 207   | 5  | 0.0039283 |
| GO:0046903 | secretion                                | BP | 1528  | 16 | 0.0039736 |
| GO:0008015 | blood circulation                        | BP | 506   | 8  | 0.0040085 |
| GO:0016042 | lipid catabolic process                  | BP | 299   | 6  | 0.0040124 |
| GO:1901362 | organic cyclic compound biosynthetic ... | BP | 4358  | 34 | 0.0040128 |
| GO:0048583 | regulation of response to stimulus       | BP | 3858  | 31 | 0.004066  |
| GO:2001234 | negative regulation of apoptotic sign... | BP | 209   | 5  | 0.0040914 |
| GO:0046889 | positive regulation of lipid biosynth... | BP | 64    | 3  | 0.0040986 |
| GO:0051881 | regulation of mitochondrial membrane ... | BP | 64    | 3  | 0.0040986 |
| GO:0032990 | cell part morphogenesis                  | BP | 623   | 9  | 0.0041666 |
| GO:0097746 | regulation of blood vessel diameter      | BP | 130   | 4  | 0.0041976 |
| GO:0035296 | regulation of tube diameter              | BP | 130   | 4  | 0.0041976 |
| GO:0032940 | secretion by cell                        | BP | 1398  | 15 | 0.0042342 |
| GO:0003013 | circulatory system process               | BP | 511   | 8  | 0.0042509 |
| GO:0018130 | heterocycle biosynthetic process         | BP | 4211  | 33 | 0.0043619 |
| GO:0048666 | neuron development                       | BP | 999   | 12 | 0.004373  |

|            |                                          |    |       |    |           |
|------------|------------------------------------------|----|-------|----|-----------|
| GO:2000026 | regulation of multicellular organisma... | BP | 1835  | 18 | 0.0044687 |
| GO:0019438 | aromatic compound biosynthetic proces... | BP | 4218  | 33 | 0.0044788 |
| GO:0007423 | sensory organ development                | BP | 516   | 8  | 0.0045044 |
| GO:0065007 | biological regulation                    | BP | 11517 | 72 | 0.0045775 |
| GO:0031175 | neuron projection development            | BP | 878   | 11 | 0.0046386 |
| GO:0030574 | collagen catabolic process               | BP | 67    | 3  | 0.0046616 |
| GO:0097061 | dendritic spine organization             | BP | 67    | 3  | 0.0046616 |
| GO:0009583 | detection of light stimulus              | BP | 67    | 3  | 0.0046616 |
| GO:0042060 | wound healing                            | BP | 519   | 8  | 0.004662  |
| GO:0040008 | regulation of growth                     | BP | 635   | 9  | 0.0047132 |
| GO:0006865 | amino acid transport                     | BP | 135   | 4  | 0.0047978 |
| GO:0007612 | learning                                 | BP | 136   | 4  | 0.0049244 |
| GO:0060078 | regulation of postsynaptic membrane p... | BP | 136   | 4  | 0.0049244 |
| GO:0046425 | regulation of JAK-STAT cascade           | BP | 137   | 4  | 0.0050532 |
| GO:1904892 | regulation of STAT cascade               | BP | 137   | 4  | 0.0050532 |
| GO:0046483 | heterocycle metabolic process            | BP | 5819  | 42 | 0.0050885 |
| GO:0031399 | regulation of protein modification pr... | BP | 1713  | 17 | 0.0051207 |
| GO:0050880 | regulation of blood vessel size          | BP | 138   | 4  | 0.0051842 |
| GO:0106027 | neuron projection organization           | BP | 70    | 3  | 0.0052693 |
| GO:0010975 | regulation of neuron projection devel... | BP | 420   | 7  | 0.0052978 |
| GO:0035150 | regulation of tube size                  | BP | 139   | 4  | 0.0053175 |
| GO:0051239 | regulation of multicellular organisma... | BP | 2786  | 24 | 0.0053256 |
| GO:0006139 | nucleobase-containing compound metabo... | BP | 5657  | 41 | 0.005362  |
| GO:0045981 | positive regulation of nucleotide met... | BP | 140   | 4  | 0.0054531 |
| GO:1900544 | positive regulation of purine nucleot... | BP | 140   | 4  | 0.0054531 |
| GO:0009628 | response to abiotic stimulus             | BP | 1162  | 13 | 0.0054892 |
| GO:0048513 | animal organ development                 | BP | 3281  | 27 | 0.005637  |
| GO:0030155 | regulation of cell adhesion              | BP | 655   | 9  | 0.0057469 |
| GO:0007596 | blood coagulation                        | BP | 323   | 6  | 0.0058139 |
| GO:0034109 | homotypic cell-cell adhesion             | BP | 73    | 3  | 0.0059224 |
| GO:0007409 | axonogenesis                             | BP | 431   | 7  | 0.0060795 |
| GO:0050817 | coagulation                              | BP | 327   | 6  | 0.0061637 |
| GO:0014070 | response to organic cyclic compound      | BP | 914   | 11 | 0.0062281 |

|            |                                          |    |       |    |           |
|------------|------------------------------------------|----|-------|----|-----------|
| GO:0007166 | cell surface receptor signaling pathw... | BP | 2663  | 23 | 0.0062329 |
| GO:0044236 | multicellular organism metabolic proc... | BP | 146   | 4  | 0.0063155 |
| GO:0044243 | multicellular organismal catabolic pr... | BP | 75    | 3  | 0.0063836 |
| GO:0051952 | regulation of amine transport            | BP | 75    | 3  | 0.0063836 |
| GO:0044283 | small molecule biosynthetic process      | BP | 549   | 8  | 0.0064822 |
| GO:0043270 | positive regulation of ion transport     | BP | 234   | 5  | 0.0065591 |
| GO:2001022 | positive regulation of response to DN... | BP | 77    | 3  | 0.0068656 |
| GO:0022408 | negative regulation of cell-cell adhe... | BP | 150   | 4  | 0.0069381 |
| GO:0002695 | negative regulation of leukocyte acti... | BP | 150   | 4  | 0.0069381 |
| GO:0007162 | negative regulation of cell adhesion     | BP | 238   | 5  | 0.0070332 |
| GO:0001932 | regulation of protein phosphorylation    | BP | 1337  | 14 | 0.0070372 |
| GO:0043009 | chordate embryonic development           | BP | 557   | 8  | 0.0070483 |
| GO:0006351 | transcription, DNA-templated             | BP | 3667  | 29 | 0.0070507 |
| GO:0031345 | negative regulation of cell projectio... | BP | 151   | 4  | 0.0070998 |
| GO:0006355 | regulation of transcription, DNA-temp... | BP | 3508  | 28 | 0.0072439 |
| GO:0008285 | negative regulation of cell prolifera... | BP | 680   | 9  | 0.0072771 |
| GO:0051091 | positive regulation of DNA binding tr... | BP | 240   | 5  | 0.0072791 |
| GO:1903076 | regulation of protein localization to... | BP | 79    | 3  | 0.0073686 |
| GO:0009792 | embryo development ending in birth or... | BP | 562   | 8  | 0.0074206 |
| GO:0097659 | nucleic acid-templated transcription     | BP | 3683  | 29 | 0.007491  |
| GO:0009987 | cellular process                         | BP | 15094 | 88 | 0.0075323 |
| GO:0120035 | regulation of plasma membrane bounded... | BP | 564   | 8  | 0.0075736 |
| GO:0042221 | response to chemical                     | BP | 4192  | 32 | 0.0075751 |
| GO:0030307 | positive regulation of cell growth       | BP | 154   | 4  | 0.0076    |
| GO:0097435 | supramolecular fiber organization        | BP | 565   | 8  | 0.007651  |
| GO:0030168 | platelet activation                      | BP | 155   | 4  | 0.0077718 |
| GO:1903506 | regulation of nucleic acid-templated ... | BP | 3529  | 28 | 0.0078531 |
| GO:0050810 | regulation of steroid biosynthetic pr... | BP | 81    | 3  | 0.007893  |
| GO:0048518 | positive regulation of biological pro... | BP | 5423  | 39 | 0.0079165 |
| GO:0032774 | RNA biosynthetic process                 | BP | 3699  | 29 | 0.0079543 |
| GO:0045664 | regulation of neuron differentiation     | BP | 569   | 8  | 0.0079666 |
| GO:0006357 | regulation of transcription from RNA ... | BP | 1944  | 18 | 0.0080347 |
| GO:2001141 | regulation of RNA biosynthetic proces... | BP | 3537  | 28 | 0.0080961 |

|            |                                          |    |      |    |           |
|------------|------------------------------------------|----|------|----|-----------|
| GO:0007519 | skeletal muscle tissue development       | BP | 157  | 4  | 0.0081229 |
| GO:0120036 | plasma membrane bounded cell projecti... | BP | 1363 | 14 | 0.0082756 |
| GO:2001242 | regulation of intrinsic apoptotic sig... | BP | 158  | 4  | 0.0083023 |
| GO:2000027 | regulation of organ morphogenesis        | BP | 248  | 5  | 0.0083226 |
| GO:1902533 | positive regulation of intracellular ... | BP | 952  | 11 | 0.0083435 |
| GO:0015837 | amine transport                          | BP | 83   | 3  | 0.0084389 |
| GO:0050886 | endocrine process                        | BP | 83   | 3  | 0.0084389 |
| GO:0031344 | regulation of cell projection organiz... | BP | 575  | 8  | 0.0084583 |
| GO:0007259 | JAK-STAT cascade                         | BP | 159  | 4  | 0.0084843 |
| GO:0097696 | STAT cascade                             | BP | 159  | 4  | 0.0084843 |
| GO:0006469 | negative regulation of protein kinase... | BP | 250  | 5  | 0.0085989 |
| GO:0003018 | vascular process in circulatory syste... | BP | 160  | 4  | 0.0086689 |
| GO:0051252 | regulation of RNA metabolic process      | BP | 3723 | 29 | 0.0086939 |
| GO:0032844 | regulation of homeostatic process        | BP | 464  | 7  | 0.0089452 |
| GO:0030193 | regulation of blood coagulation          | BP | 85   | 3  | 0.0090065 |
| GO:0019217 | regulation of fatty acid metabolic pr... | BP | 85   | 3  | 0.0090065 |
| GO:1900046 | regulation of hemostasis                 | BP | 85   | 3  | 0.0090065 |
| GO:0097006 | regulation of plasma lipoprotein part... | BP | 86   | 3  | 0.0092985 |
| GO:0061564 | axon development                         | BP | 468  | 7  | 0.0093502 |
| GO:0006835 | dicarboxylic acid transport              | BP | 87   | 3  | 0.0095959 |
| GO:1904375 | regulation of protein localization to... | BP | 87   | 3  | 0.0095959 |
| GO:0051128 | regulation of cellular component orga... | BP | 2288 | 20 | 0.0096156 |
| GO:0006366 | transcription from RNA polymerase II ... | BP | 2133 | 19 | 0.0096167 |
| GO:0060538 | skeletal muscle organ development        | BP | 165  | 4  | 0.0096312 |
| GO:0008283 | cell proliferation                       | BP | 1982 | 18 | 0.009722  |
| GO:0030030 | cell projection organization             | BP | 1392 | 14 | 0.0098558 |
| GO:0006112 | energy reserve metabolic process         | BP | 88   | 3  | 0.0098989 |
| GO:0003073 | regulation of systemic arterial blood... | BP | 88   | 3  | 0.0098989 |

**Table S2D.** Enriched biological pathways based on *hypermethylated* DMRs in subcutaneous adipose tissue after sleep loss compared with sleep.

| GO term ID | Term name                                | Namespace | N    | DE | q value   |
|------------|------------------------------------------|-----------|------|----|-----------|
| GO:0050877 | nervous system process                   | BP        | 1217 | 15 | 0.0000157 |
| GO:0050804 | modulation of chemical synaptic trans... | BP        | 306  | 7  | 0.0000922 |
| GO:0003008 | system process                           | BP        | 1953 | 18 | 0.0000962 |
| GO:0050806 | positive regulation of synaptic trans... | BP        | 134  | 5  | 0.000103  |
| GO:0007605 | sensory perception of sound              | BP        | 143  | 5  | 0.0001398 |
| GO:1901700 | response to oxygen-containing compoun... | BP        | 1512 | 15 | 0.0001853 |
| GO:0009605 | response to external stimulus            | BP        | 2071 | 18 | 0.000202  |
| GO:0050954 | sensory perception of mechanical stim... | BP        | 160  | 5  | 0.0002359 |
| GO:0033993 | response to lipid                        | BP        | 893  | 11 | 0.0002451 |
| GO:0033273 | response to vitamin                      | BP        | 90   | 4  | 0.0002711 |
| GO:0023051 | regulation of signaling                  | BP        | 3363 | 24 | 0.0002951 |
| GO:0010648 | negative regulation of cell communica... | BP        | 1274 | 13 | 0.0004039 |
| GO:0023057 | negative regulation of signaling         | BP        | 1278 | 13 | 0.0004161 |
| GO:0000904 | cell morphogenesis involved in differ... | BP        | 658  | 9  | 0.0004432 |
| GO:0030199 | collagen fibril organization             | BP        | 43   | 3  | 0.0004459 |
| GO:0010646 | regulation of cell communication         | BP        | 3314 | 23 | 0.0006188 |
| GO:0009628 | response to abiotic stimulus             | BP        | 1162 | 12 | 0.0006215 |
| GO:0022610 | biological adhesion                      | BP        | 1339 | 13 | 0.0006463 |
| GO:0046426 | negative regulation of JAK-STAT casca... | BP        | 50   | 3  | 0.000696  |
| GO:1904893 | negative regulation of STAT cascade      | BP        | 50   | 3  | 0.000696  |
| GO:0007409 | axonogenesis                             | BP        | 431  | 7  | 0.0007336 |
| GO:0050953 | sensory perception of light stimulus     | BP        | 206  | 5  | 0.0007482 |
| GO:0009581 | detection of external stimulus           | BP        | 124  | 4  | 0.0009106 |
| GO:0034381 | plasma lipoprotein particle clearance    | BP        | 55   | 3  | 0.0009201 |
| GO:0006820 | anion transport                          | BP        | 587  | 8  | 0.0009573 |
| GO:0009582 | detection of abiotic stimulus            | BP        | 127  | 4  | 0.0009954 |
| GO:0061564 | axon development                         | BP        | 468  | 7  | 0.0011841 |
| GO:0007612 | learning                                 | BP        | 136  | 4  | 0.0012827 |
| GO:0007611 | learning or memory                       | BP        | 233  | 5  | 0.0012958 |
| GO:0015909 | long-chain fatty acid transport          | BP        | 62   | 3  | 0.0013036 |

|            |                                          |    |       |    |           |
|------------|------------------------------------------|----|-------|----|-----------|
| GO:0046425 | regulation of JAK-STAT cascade           | BP | 137   | 4  | 0.0013178 |
| GO:1904892 | regulation of STAT cascade               | BP | 137   | 4  | 0.0013178 |
| GO:0061448 | connective tissue development            | BP | 235   | 5  | 0.0013457 |
| GO:0048585 | negative regulation of response to st... | BP | 1458  | 13 | 0.0014125 |
| GO:0035556 | intracellular signal transduction        | BP | 2659  | 19 | 0.0014992 |
| GO:0023052 | signaling                                | BP | 6178  | 34 | 0.0015402 |
| GO:0009583 | detection of light stimulus              | BP | 67    | 3  | 0.0016308 |
| GO:0009653 | anatomical structure morphogenesis       | BP | 2470  | 18 | 0.0016455 |
| GO:1902532 | negative regulation of intracellular ... | BP | 503   | 7  | 0.0017876 |
| GO:0015718 | monocarboxylic acid transport            | BP | 153   | 4  | 0.0019755 |
| GO:0007155 | cell adhesion                            | BP | 1332  | 12 | 0.00201   |
| GO:0022603 | regulation of anatomical structure mo... | BP | 982   | 10 | 0.0020245 |
| GO:0007519 | skeletal muscle tissue development       | BP | 157   | 4  | 0.0021699 |
| GO:0010033 | response to organic substance            | BP | 2965  | 20 | 0.0022079 |
| GO:0009968 | negative regulation of signal transdu... | BP | 1169  | 11 | 0.0022356 |
| GO:0007259 | JAK-STAT cascade                         | BP | 159   | 4  | 0.0022718 |
| GO:0097696 | STAT cascade                             | BP | 159   | 4  | 0.0022718 |
| GO:0048667 | cell morphogenesis involved in neuron... | BP | 527   | 7  | 0.0023237 |
| GO:0022414 | reproductive process                     | BP | 1356  | 12 | 0.0023317 |
| GO:0000003 | reproduction                             | BP | 1357  | 12 | 0.002346  |
| GO:1901701 | cellular response to oxygen-containin... | BP | 1005  | 10 | 0.0023964 |
| GO:0050890 | cognition                                | BP | 270   | 5  | 0.0024672 |
| GO:0008150 | biological_process                       | BP | 16519 | 68 | 0.0024837 |
| GO:0032102 | negative regulation of response to ex... | BP | 272   | 5  | 0.002547  |
| GO:0007267 | cell-cell signaling                      | BP | 1561  | 13 | 0.0025868 |
| GO:0060538 | skeletal muscle organ development        | BP | 165   | 4  | 0.0025975 |
| GO:0032989 | cellular component morphogenesis         | BP | 1018  | 10 | 0.0026299 |
| GO:1902531 | regulation of intracellular signal tr... | BP | 1772  | 14 | 0.0028381 |
| GO:0009966 | regulation of signal transduction        | BP | 3031  | 20 | 0.0028691 |
| GO:0007584 | response to nutrient                     | BP | 170   | 4  | 0.0028923 |
| GO:0007600 | sensory perception                       | BP | 873   | 9  | 0.0031521 |
| GO:0071396 | cellular response to lipid               | BP | 558   | 7  | 0.0031914 |
| GO:0030193 | regulation of blood coagulation          | BP | 85    | 3  | 0.0032159 |

|            |                                          |    |      |    |           |
|------------|------------------------------------------|----|------|----|-----------|
| GO:1900046 | regulation of hemostasis                 | BP | 85   | 3  | 0.0032159 |
| GO:0097006 | regulation of plasma lipoprotein part... | BP | 86   | 3  | 0.0033239 |
| GO:0007154 | cell communication                       | BP | 6196 | 33 | 0.0033866 |
| GO:0097435 | supramolecular fiber organization        | BP | 565  | 7  | 0.0034178 |
| GO:0050896 | response to stimulus                     | BP | 8322 | 41 | 0.0034528 |
| GO:0051216 | cartilage development                    | BP | 180  | 4  | 0.0035492 |
| GO:0009416 | response to light stimulus               | BP | 294  | 5  | 0.0035533 |
| GO:0007610 | behavior                                 | BP | 572  | 7  | 0.0036563 |
| GO:0050818 | regulation of coagulation                | BP | 89   | 3  | 0.0036612 |
| GO:0021549 | cerebellum development                   | BP | 90   | 3  | 0.0037781 |
| GO:0015908 | fatty acid transport                     | BP | 90   | 3  | 0.0037781 |
| GO:0009314 | response to radiation                    | BP | 432  | 6  | 0.0038571 |
| GO:0007565 | female pregnancy                         | BP | 186  | 4  | 0.0039885 |
| GO:0046942 | carboxylic acid transport                | BP | 303  | 5  | 0.0040377 |
| GO:1905114 | cell surface receptor signaling pathw... | BP | 585  | 7  | 0.0041328 |
| GO:0098869 | cellular oxidant detoxification          | BP | 93   | 3  | 0.0041424 |
| GO:0002062 | chondrocyte differentiation              | BP | 93   | 3  | 0.0041424 |
| GO:0048812 | neuron projection morphogenesis          | BP | 587  | 7  | 0.0042101 |
| GO:0000902 | cell morphogenesis                       | BP | 921  | 9  | 0.0044768 |
| GO:0015849 | organic acid transport                   | BP | 311  | 5  | 0.0045064 |
| GO:0050905 | neuromuscular process                    | BP | 96   | 3  | 0.0045274 |
| GO:0001763 | morphogenesis of a branching structur... | BP | 193  | 4  | 0.0045459 |
| GO:0015711 | organic anion transport                  | BP | 449  | 6  | 0.0046494 |
| GO:1990748 | cellular detoxification                  | BP | 97   | 3  | 0.0046604 |
| GO:0098916 | anterograde trans-synaptic signaling     | BP | 600  | 7  | 0.0047397 |
| GO:0007268 | chemical synaptic transmission           | BP | 600  | 7  | 0.0047397 |
| GO:0120039 | plasma membrane bounded cell projecti... | BP | 601  | 7  | 0.0047824 |
| GO:0022037 | metencephalon development                | BP | 98   | 3  | 0.0047957 |
| GO:0099536 | synaptic signaling                       | BP | 602  | 7  | 0.0048255 |
| GO:0099537 | trans-synaptic signaling                 | BP | 602  | 7  | 0.0048255 |
| GO:0048858 | cell projection morphogenesis            | BP | 604  | 7  | 0.0049124 |
| GO:0098754 | detoxification                           | BP | 101  | 3  | 0.0052158 |
| GO:0007601 | visual perception                        | BP | 202  | 4  | 0.0053367 |



|            |                                          |    |       |    |           |
|------------|------------------------------------------|----|-------|----|-----------|
| GO:0009612 | response to mechanical stimulus          | BP | 205   | 4  | 0.0056196 |
| GO:0030154 | cell differentiation                     | BP | 3908  | 23 | 0.0056336 |
| GO:0030198 | extracellular matrix organization        | BP | 329   | 5  | 0.0057011 |
| GO:0043062 | extracellular structure organization     | BP | 330   | 5  | 0.0057735 |
| GO:0032990 | cell part morphogenesis                  | BP | 623   | 7  | 0.0057985 |
| GO:0097237 | cellular response to toxic substance     | BP | 105   | 3  | 0.0058095 |
| GO:0044070 | regulation of anion transport            | BP | 105   | 3  | 0.0058095 |
| GO:0032502 | developmental process                    | BP | 5921  | 31 | 0.006414  |
| GO:0048468 | cell development                         | BP | 1944  | 14 | 0.0064677 |
| GO:0042221 | response to chemical                     | BP | 4192  | 24 | 0.0065089 |
| GO:0044706 | multi-multicellular organism process     | BP | 215   | 4  | 0.0066344 |
| GO:0001501 | skeletal system development              | BP | 486   | 6  | 0.0067816 |
| GO:0009887 | animal organ morphogenesis               | BP | 985   | 9  | 0.0068808 |
| GO:0099565 | chemical synaptic transmission, posts... | BP | 114   | 3  | 0.0072888 |
| GO:0065007 | biological regulation                    | BP | 11517 | 51 | 0.0075926 |
| GO:0048699 | generation of neurons                    | BP | 1378  | 11 | 0.0076871 |
| GO:0003231 | cardiac ventricle development            | BP | 119   | 3  | 0.0081983 |
| GO:0007399 | nervous system development               | BP | 2211  | 15 | 0.0082159 |
| GO:0014706 | striated muscle tissue development       | BP | 360   | 5  | 0.0082573 |
| GO:0032963 | collagen metabolic process               | BP | 120   | 3  | 0.0083878 |
| GO:0048856 | anatomical structure development         | BP | 5518  | 29 | 0.0084578 |
| GO:0032501 | multicellular organismal process         | BP | 7084  | 35 | 0.0086641 |
| GO:0050680 | negative regulation of epithelial cel... | BP | 122   | 3  | 0.0087747 |
| GO:0070887 | cellular response to chemical stimulu... | BP | 2892  | 18 | 0.0088916 |
| GO:0007423 | sensory organ development                | BP | 516   | 6  | 0.0089735 |
| GO:0044259 | multicellular organismal macromolecul... | BP | 125   | 3  | 0.0093743 |
| GO:0098657 | import into cell                         | BP | 683   | 7  | 0.0093939 |
| GO:0007275 | multicellular organism development       | BP | 5056  | 27 | 0.0094175 |
| GO:0048869 | cellular developmental process           | BP | 4078  | 23 | 0.0094735 |
| GO:0010647 | positive regulation of cell communica... | BP | 1619  | 12 | 0.0094854 |
| GO:0023056 | positive regulation of signaling         | BP | 1625  | 12 | 0.009753  |
| GO:0051094 | positive regulation of developmental ... | BP | 1233  | 10 | 0.0099083 |

**Table S2E.** Enriched biological pathways based on *hypomethylated* DMRs in subcutaneous adipose tissue after sleep loss compared with sleep.

| GO term    | Term                                     | Namespace | N    | DE | q value   |
|------------|------------------------------------------|-----------|------|----|-----------|
| GO:0043517 | positive regulation of DNA damage res... | BP        | 14   | 3  | 0.0000013 |
| GO:1901798 | positive regulation of signal transdu... | BP        | 21   | 3  | 0.0000049 |
| GO:0051216 | cartilage development                    | BP        | 180  | 5  | 0.0000095 |
| GO:0043516 | regulation of DNA damage response, si... | BP        | 30   | 3  | 0.0000148 |
| GO:0048705 | skeletal system morphogenesis            | BP        | 210  | 5  | 0.00002   |
| GO:2001233 | regulation of apoptotic signaling pat... | BP        | 378  | 6  | 0.0000273 |
| GO:0097190 | apoptotic signaling pathway              | BP        | 584  | 7  | 0.0000329 |
| GO:0061448 | connective tissue development            | BP        | 235  | 5  | 0.0000343 |
| GO:0001501 | skeletal system development              | BP        | 486  | 6  | 0.0001099 |
| GO:0045861 | negative regulation of proteolysis       | BP        | 335  | 5  | 0.0001822 |
| GO:0060348 | bone development                         | BP        | 183  | 4  | 0.0002025 |
| GO:0019216 | regulation of lipid metabolic process    | BP        | 358  | 5  | 0.0002477 |
| GO:2001022 | positive regulation of response to DN... | BP        | 77   | 3  | 0.0002527 |
| GO:0019217 | regulation of fatty acid metabolic pr... | BP        | 85   | 3  | 0.0003382 |
| GO:0060349 | bone morphogenesis                       | BP        | 88   | 3  | 0.0003746 |
| GO:0007631 | feeding behavior                         | BP        | 108  | 3  | 0.0006817 |
| GO:0030330 | DNA damage response, signal transduct... | BP        | 109  | 3  | 0.0007003 |
| GO:0045595 | regulation of cell differentiation       | BP        | 1649 | 9  | 0.0009084 |
| GO:0050878 | regulation of body fluid levels          | BP        | 480  | 5  | 0.0009398 |
| GO:0045834 | positive regulation of lipid metaboli... | BP        | 123  | 3  | 0.0009941 |
| GO:0042770 | signal transduction in response to DN... | BP        | 123  | 3  | 0.0009941 |
| GO:0097193 | intrinsic apoptotic signaling pathway    | BP        | 290  | 4  | 0.0011452 |
| GO:0097746 | regulation of blood vessel diameter      | BP        | 130  | 3  | 0.0011662 |
| GO:0035296 | regulation of tube diameter              | BP        | 130  | 3  | 0.0011662 |
| GO:0010646 | regulation of cell communication         | BP        | 3314 | 13 | 0.0012232 |
| GO:0050880 | regulation of blood vessel size          | BP        | 138  | 3  | 0.0013848 |

|            |                                          |    |      |    |           |
|------------|------------------------------------------|----|------|----|-----------|
| GO:0023051 | regulation of signaling                  | BP | 3363 | 13 | 0.0014051 |
| GO:0035150 | regulation of tube size                  | BP | 139  | 3  | 0.0014138 |
| GO:0045981 | positive regulation of nucleotide met... | BP | 140  | 3  | 0.0014432 |
| GO:1900544 | positive regulation of purine nucleot... | BP | 140  | 3  | 0.0014432 |
| GO:0002695 | negative regulation of leukocyte acti... | BP | 150  | 3  | 0.0017583 |
| GO:0007599 | hemostasis                               | BP | 328  | 4  | 0.0017994 |
| GO:0030154 | cell differentiation                     | BP | 3908 | 14 | 0.0018045 |
| GO:0007188 | adenylate cyclase-modulating G-protei... | BP | 153  | 3  | 0.0018605 |
| GO:0034641 | cellular nitrogen compound metabolic ... | BP | 6434 | 19 | 0.001894  |
| GO:0030307 | positive regulation of cell growth       | BP | 154  | 3  | 0.0018954 |
| GO:0006915 | apoptotic process                        | BP | 1840 | 9  | 0.0019667 |
| GO:0009967 | positive regulation of signal transdu... | BP | 1483 | 8  | 0.0019915 |
| GO:0007610 | behavior                                 | BP | 572  | 5  | 0.0020387 |
| GO:2001242 | regulation of intrinsic apoptotic sig... | BP | 158  | 3  | 0.0020391 |
| GO:0003018 | vascular process in circulatory syste... | BP | 160  | 3  | 0.0021134 |
| GO:0010565 | regulation of cellular ketone metabol... | BP | 165  | 3  | 0.0023065 |
| GO:0046890 | regulation of lipid biosynthetic proc... | BP | 166  | 3  | 0.0023463 |
| GO:0050866 | negative regulation of cell activatio... | BP | 169  | 3  | 0.0024686 |
| GO:0090304 | nucleic acid metabolic process           | BP | 5008 | 16 | 0.0024882 |
| GO:0048856 | anatomical structure development         | BP | 5518 | 17 | 0.0025028 |
| GO:2001235 | positive regulation of apoptotic sign... | BP | 174  | 3  | 0.0026809 |
| GO:0051129 | negative regulation of cellular compo... | BP | 611  | 5  | 0.002714  |
| GO:2001020 | regulation of response to DNA damage ... | BP | 175  | 3  | 0.0027247 |
| GO:1901796 | regulation of signal transduction by ... | BP | 175  | 3  | 0.0027247 |
| GO:0048869 | cellular developmental process           | BP | 4078 | 14 | 0.0027367 |
| GO:0051783 | regulation of nuclear division           | BP | 179  | 3  | 0.0029043 |
| GO:0007187 | G-protein coupled receptor signaling ... | BP | 180  | 3  | 0.0029503 |
| GO:0001558 | regulation of cell growth                | BP | 380  | 4  | 0.0030641 |
| GO:0012501 | programmed cell death                    | BP | 1969 | 9  | 0.0031295 |

|            |                                          |    |      |    |           |
|------------|------------------------------------------|----|------|----|-----------|
| GO:0002683 | negative regulation of immune system ... | BP | 387  | 4  | 0.0032712 |
| GO:0006139 | nucleobase-containing compound metabo... | BP | 5657 | 17 | 0.0033214 |
| GO:0040007 | growth                                   | BP | 937  | 6  | 0.0034061 |
| GO:0010647 | positive regulation of cell communica... | BP | 1619 | 8  | 0.0034437 |
| GO:0023056 | positive regulation of signaling         | BP | 1625 | 8  | 0.003523  |
| GO:0007626 | locomotory behavior                      | BP | 192  | 3  | 0.0035377 |
| GO:1903530 | regulation of secretion by cell          | BP | 653  | 5  | 0.0036098 |
| GO:0001775 | cell activation                          | BP | 1279 | 7  | 0.0036583 |
| GO:0023061 | signal release                           | BP | 417  | 4  | 0.0042673 |
| GO:0009653 | anatomical structure morphogenesis       | BP | 2470 | 10 | 0.0042875 |
| GO:0009887 | animal organ morphogenesis               | BP | 985  | 6  | 0.0043522 |
| GO:0048732 | gland development                        | BP | 421  | 4  | 0.0044141 |
| GO:2001234 | negative regulation of apoptotic sign... | BP | 209  | 3  | 0.004485  |
| GO:0046483 | heterocycle metabolic process            | BP | 5819 | 17 | 0.0045548 |
| GO:0007155 | cell adhesion                            | BP | 1332 | 7  | 0.0045755 |
| GO:0022610 | biological adhesion                      | BP | 1339 | 7  | 0.0047087 |
| GO:0008219 | cell death                               | BP | 2094 | 9  | 0.0047278 |
| GO:0006725 | cellular aromatic compound metabolic ... | BP | 5857 | 17 | 0.0048946 |
| GO:0051716 | cellular response to stimulus            | BP | 6947 | 19 | 0.0049542 |
| GO:0080134 | regulation of response to stress         | BP | 1353 | 7  | 0.004984  |
| GO:0048522 | positive regulation of cellular proce... | BP | 4846 | 15 | 0.0050759 |
| GO:0051046 | regulation of secretion                  | BP | 711  | 5  | 0.0051746 |
| GO:0032502 | developmental process                    | BP | 5921 | 17 | 0.0055155 |
| GO:0042180 | cellular ketone metabolic process        | BP | 229  | 3  | 0.0057798 |
| GO:0032940 | secretion by cell                        | BP | 1398 | 7  | 0.0059523 |
| GO:0009966 | regulation of signal transduction        | BP | 3031 | 11 | 0.0060938 |
| GO:0016049 | cell growth                              | BP | 474  | 4  | 0.0066913 |
| GO:0030162 | regulation of proteolysis                | BP | 758  | 5  | 0.0067581 |
| GO:0010817 | regulation of hormone levels             | BP | 481  | 4  | 0.0070409 |

|            |                                          |    |      |    |           |
|------------|------------------------------------------|----|------|----|-----------|
| GO:0045927 | positive regulation of growth            | BP | 248  | 3  | 0.0071981 |
| GO:1901360 | organic cyclic compound metabolic pro... | BP | 6069 | 17 | 0.0072099 |
| GO:0050896 | response to stimulus                     | BP | 8322 | 21 | 0.0072777 |
| GO:0042981 | regulation of apoptotic process          | BP | 1459 | 7  | 0.0074849 |
| GO:0046883 | regulation of hormone secretion          | BP | 252  | 3  | 0.0075207 |
| GO:0007275 | multicellular organism development       | BP | 5056 | 15 | 0.0076765 |
| GO:0006974 | cellular response to DNA damage stimu... | BP | 782  | 5  | 0.0076864 |
| GO:1900542 | regulation of purine nucleotide metab... | BP | 255  | 3  | 0.0077682 |
| GO:0006996 | organelle organization                   | BP | 3595 | 12 | 0.0078426 |
| GO:0022008 | neurogenesis                             | BP | 1472 | 7  | 0.0078466 |
| GO:0043067 | regulation of programmed cell death      | BP | 1474 | 7  | 0.0079033 |
| GO:0006950 | response to stress                       | BP | 3616 | 12 | 0.0082168 |
| GO:0006140 | regulation of nucleotide metabolic pr... | BP | 262  | 3  | 0.0083644 |
| GO:0008015 | blood circulation                        | BP | 506  | 4  | 0.0083881 |
| GO:0045321 | leukocyte activation                     | BP | 1131 | 6  | 0.0084427 |
| GO:0044092 | negative regulation of molecular func... | BP | 1135 | 6  | 0.0085841 |
| GO:0003013 | circulatory system process               | BP | 511  | 4  | 0.0086765 |
| GO:0072331 | signal transduction by p53 class medi... | BP | 268  | 3  | 0.0088964 |
| GO:0090068 | positive regulation of cell cycle pro... | BP | 269  | 3  | 0.0089869 |
| GO:0009888 | tissue development                       | BP | 1901 | 8  | 0.0090181 |
| GO:0050890 | cognition                                | BP | 270  | 3  | 0.009078  |
| GO:0060284 | regulation of cell development           | BP | 815  | 5  | 0.0091044 |
| GO:0042060 | wound healing                            | BP | 519  | 4  | 0.0091514 |
| GO:0046903 | secretion                                | BP | 1528 | 7  | 0.0095562 |
| GO:0043066 | negative regulation of apoptotic proc... | BP | 828  | 5  | 0.00971   |

| <b>Table S2F.</b> CpG probes closest to reaching significance in skeletal muscle in response to sleep loss compared with sleep. |            |                 |              |                           |           |                |                |
|---------------------------------------------------------------------------------------------------------------------------------|------------|-----------------|--------------|---------------------------|-----------|----------------|----------------|
| <b>Probe</b>                                                                                                                    | <b>Chr</b> | <b>position</b> | <b>logFC</b> | <b>Average expression</b> | <b>t</b>  | <b>P-value</b> | <b>q value</b> |
| cg02934600                                                                                                                      | chr1       | 107600376       | 0.02753258   | 0.34215503                | 6.774544  | 3.94E-06       | 0.9988396      |
| cg06070414                                                                                                                      | chr7       | 95226412        | 0.04423437   | 0.24776351                | 6.493057  | 6.61E-06       | 0.9988396      |
| cg00722081                                                                                                                      | chr10      | 61147668        | -0.02842205  | 0.62892642                | -6.327758 | 9.00E-06       | 0.9988396      |
| cg26493306                                                                                                                      | chr5       | 134463458       | 0.02261804   | 0.9203585                 | 6.275672  | 9.92E-06       | 0.9988396      |
| cg04957146                                                                                                                      | chr17      | 2551652         | 0.02149195   | 0.87135571                | 6.164014  | 1.23E-05       | 0.9988396      |
| cg01051642                                                                                                                      | chr1       | 2517410         | 0.02560049   | 0.11585213                | 6.000548  | 1.67E-05       | 0.9988396      |
| cg09250087                                                                                                                      | chr2       | 161127564       | 0.02914209   | 0.69137042                | 5.862363  | 2.19E-05       | 0.9988396      |
| cg20292318                                                                                                                      | chr17      | 77141853        | -0.02535266  | 0.81763694                | -5.494034 | 4.51E-05       | 0.9988396      |
| cg10747185                                                                                                                      | chr3       | 176862267       | 0.03792301   | 0.83633599                | 5.493864  | 4.51E-05       | 0.9988396      |
| cg03063453                                                                                                                      | chr19      | 52693134        | 0.02288002   | 0.13384391                | 5.490893  | 4.53E-05       | 0.9988396      |
| cg23335976                                                                                                                      | chr10      | 18240598        | 0.03056735   | 0.80908058                | 5.471804  | 4.71E-05       | 0.9988396      |
| cg26497185                                                                                                                      | chr10      | 125819893       | 0.0345724    | 0.79512816                | 5.385925  | 5.59E-05       | 0.9988396      |
| cg20983329                                                                                                                      | chrX       | 70338670        | 0.04096218   | 0.3271348                 | 5.345167  | 6.07E-05       | 0.9988396      |
| cg17804627                                                                                                                      | chr1       | 35325459        | -0.01576963  | 0.05522482                | -5.306514 | 6.56E-05       | 0.9988396      |
| cg25013978                                                                                                                      | chr5       | 36149258        | 0.02967198   | 0.71095467                | 5.286903  | 6.82E-05       | 0.9988396      |
| cg16328558                                                                                                                      | chr1       | 45766469        | 0.02206586   | 0.85455378                | 5.283494  | 6.87E-05       | 0.9988396      |
| cg26794871                                                                                                                      | chr20      | 44934712        | -0.03087938  | 0.70890816                | -5.245018 | 7.42E-05       | 0.9988396      |
| cg11759293                                                                                                                      | chr13      | 73359517        | 0.02022863   | 0.85704316                | 5.184951  | 8.38E-05       | 0.9988396      |
| cg05516004                                                                                                                      | chr21      | 46496180        | -0.0348843   | 0.72435047                | -5.183919 | 8.40E-05       | 0.9988396      |
| cg06135689                                                                                                                      | chr17      | 35085060        | -0.03399909  | 0.26722348                | -5.177792 | 8.50E-05       | 0.9988396      |

**Table S3. Differentially expressed genes in skeletal muscle and subcutaneous adipose tissue in response to acute sleep loss.**

Showing genes that are either (A) upregulated or (B) downregulated in skeletal muscle; as well as (C) upregulated or (D) downregulated genes in subcutaneous adipose tissue, based on RNA-seq of samples obtained after sleep loss compared with after normal sleep, and for transcripts with adjusted (FDR) P-values<0.05. For each gene, the following information is also listed: log fold change (fc); log counts per million (cpm); likelihood ratio (LR) statistics value; the raw and adjusted (FDR) P-values; and the Ensembl and Entrez gene ids.

| <b>Table S3A. Upregulated gene transcripts in skeletal muscle after sleep loss compared with normal sleep.</b> |               |                |           |                |            |                        |                  |
|----------------------------------------------------------------------------------------------------------------|---------------|----------------|-----------|----------------|------------|------------------------|------------------|
| <b>Gene name</b>                                                                                               | <b>log fc</b> | <b>log cpm</b> | <b>LR</b> | <b>P-value</b> | <b>FDR</b> | <b>Ensembl gene id</b> | <b>Entrez id</b> |
| <i>PDK4</i>                                                                                                    | 1.71          | 8.83           | 34.54     | 4.18E-09       | 5.25E-05   | ENSG00000004799        | 5166             |
| <i>FZD4</i>                                                                                                    | 0.39          | 6.42           | 19.93     | 8.02E-06       | 7.19E-03   | ENSG00000174804        | 8322             |
| <i>MGAM</i>                                                                                                    | 1.43          | -0.14          | 17.59     | 2.75E-05       | 1.32E-02   | ENSG00000257335        | 8972             |
| <i>CISH</i>                                                                                                    | 1.34          | 2.77           | 15.40     | 8.72E-05       | 2.28E-02   | ENSG00000114737        | 1154             |
| <i>CXCR2</i>                                                                                                   | 1.11          | 0.09           | 15.40     | 8.72E-05       | 2.28E-02   | ENSG00000180871        | 3579             |
| <i>TXNIP</i>                                                                                                   | 0.50          | 10.26          | 14.30     | 1.56E-04       | 3.27E-02   | ENSG00000117289        | 10628            |
| <i>KANK1</i>                                                                                                   | 0.25          | 5.58           | 14.27     | 1.59E-04       | 3.27E-02   | ENSG00000107104        | 23189            |
| <i>TMEM154</i>                                                                                                 | 0.77          | 0.60           | 14.21     | 1.63E-04       | 3.31E-02   | ENSG00000170006        | 201799           |
| <i>PFKFB3</i>                                                                                                  | 0.98          | 6.04           | 13.78     | 2.06E-04       | 3.64E-02   | ENSG00000170525        | 5209             |
| <i>NNMT</i>                                                                                                    | 0.97          | 2.27           | 13.72     | 2.12E-04       | 3.69E-02   | ENSG00000166741        | 4837             |
| <i>USP6NL</i>                                                                                                  | 0.50          | 1.78           | 13.58     | 2.29E-04       | 3.83E-02   | ENSG00000148429        | 9712             |
| <i>CPT1A</i>                                                                                                   | 0.43          | 3.59           | 13.15     | 2.87E-04       | 4.19E-02   | ENSG00000110090        | 1374             |
| <i>FZD5</i>                                                                                                    | 0.54          | 2.33           | 13.07     | 3.00E-04       | 4.19E-02   | ENSG00000163251        | 7855             |
| <i>PPP2R1B</i>                                                                                                 | 0.41          | 4.09           | 12.91     | 3.27E-04       | 4.23E-02   | ENSG00000137713        | 5519             |
| <i>CYSLTR1</i>                                                                                                 | 0.96          | 0.14           | 12.65     | 3.75E-04       | 4.50E-02   | ENSG00000173198        | 10800            |
| <i>MAP9</i>                                                                                                    | 0.68          | 0.33           | 12.49     | 4.08E-04       | 4.70E-02   | ENSG00000164114        | 79884            |
| <i>MTURN</i>                                                                                                   | 0.35          | 5.76           | 12.44     | 4.20E-04       | 4.70E-02   | ENSG00000180354        | 222166           |
| <i>MED12L</i>                                                                                                  | 1.48          | 0.21           | 12.36     | 4.39E-04       | 4.70E-02   | ENSG00000144893        | 116931           |

|               |      |      |       |          |          |                 |        |
|---------------|------|------|-------|----------|----------|-----------------|--------|
| <i>LRRK2</i>  | 0.24 | 5.06 | 12.35 | 4.41E-04 | 4.70E-02 | ENSG00000188906 | 120892 |
| <i>FCGR3B</i> | 0.99 | 0.57 | 12.35 | 4.41E-04 | 4.70E-02 | ENSG00000162747 | 2215   |

**Table S3B.** Downregulated gene transcripts in skeletal muscle after sleep loss compared with normal sleep.

| Gene name      | log fc | log cpm | LR    | P-value  | FDR | Ensembl gene id          | Entrez id |
|----------------|--------|---------|-------|----------|-----|--------------------------|-----------|
| <i>FAM78A</i>  | -0.52  | 5.14    | 26.71 | 2.37E-07 |     | 1.49E-03 ENSG00000126882 | 286336    |
| <i>TFRC</i>    | -0.64  | 6.94    | 25.19 | 5.18E-07 |     | 1.94E-03 ENSG00000072274 | 7037      |
| <i>PPP1R3C</i> | -0.73  | 9.36    | 24.86 | 6.17E-07 |     | 1.94E-03 ENSG00000119938 | 5507      |
| <i>JUND</i>    | -0.40  | 3.46    | 22.25 | 2.40E-06 |     | 5.36E-03 ENSG00000130522 | 3727      |
| <i>MIDN</i>    | -0.71  | 3.29    | 22.12 | 2.56E-06 |     | 5.36E-03 ENSG00000167470 | 90007     |
| <i>PKDCC</i>   | -0.39  | 5.36    | 21.16 | 4.23E-06 |     | 5.60E-03 ENSG00000162878 | 91461     |
| <i>TESK1</i>   | -0.39  | 3.92    | 20.94 | 4.74E-06 |     | 5.60E-03 ENSG00000107140 | 7016      |
| <i>NPHP1</i>   | -0.43  | 6.13    | 20.90 | 4.83E-06 |     | 5.60E-03 ENSG00000144061 | 4867      |
| <i>PTP4A3</i>  | -0.48  | 7.14    | 20.72 | 5.32E-06 |     | 5.60E-03 ENSG00000184489 | 11156     |
| <i>PROB1</i>   | -0.65  | 3.98    | 20.60 | 5.65E-06 |     | 5.60E-03 ENSG00000228672 | 389333    |
| <i>SMTNL2</i>  | -0.49  | 6.89    | 20.60 | 5.65E-06 |     | 5.60E-03 ENSG00000188176 | 342527    |
| <i>TNK2</i>    | -0.43  | 4.63    | 20.55 | 5.80E-06 |     | 5.60E-03 ENSG00000061938 | 10188     |
| <i>PLEKHH3</i> | -0.53  | 3.77    | 19.74 | 8.86E-06 |     | 7.42E-03 ENSG00000068137 | 79990     |
| <i>SH3RF3</i>  | -0.55  | 2.85    | 19.56 | 9.76E-06 |     | 7.66E-03 ENSG00000172985 | 344558    |
| <i>KCNJ11</i>  | -0.49  | 5.23    | 19.14 | 1.21E-05 |     | 8.97E-03 ENSG00000187486 | 3767      |
| <i>HES1</i>    | -0.52  | 2.93    | 18.78 | 1.47E-05 |     | 1.02E-02 ENSG00000114315 | 3280      |
| <i>BCAR1</i>   | -0.48  | 4.27    | 18.54 | 1.66E-05 |     | 1.07E-02 ENSG00000050820 | 9564      |
| <i>ZBTB7B</i>  | -0.42  | 3.51    | 18.41 | 1.78E-05 |     | 1.07E-02 ENSG00000160685 | 51043     |
| <i>SMTN</i>    | -0.40  | 5.30    | 18.40 | 1.79E-05 |     | 1.07E-02 ENSG00000183963 | 6525      |
| <i>RGMA</i>    | -0.45  | 4.74    | 18.25 | 1.94E-05 |     | 1.10E-02 ENSG00000182175 | 56963     |
| <i>SLC45A3</i> | -0.69  | 1.68    | 18.18 | 2.01E-05 |     | 1.10E-02 ENSG00000158715 | 85414     |
| <i>ZNF865</i>  | -0.54  | 1.66    | 18.09 | 2.10E-05 |     | 1.10E-02 ENSG00000261221 | 100507290 |



|                  |       |      |       |          |          |                 |        |
|------------------|-------|------|-------|----------|----------|-----------------|--------|
| <i>DOK7</i>      | -0.60 | 2.84 | 17.98 | 2.23E-05 | 1.12E-02 | ENSG00000175920 | 285489 |
| <i>C20orf166</i> | -0.40 | 6.43 | 17.48 | 2.91E-05 | 1.32E-02 | ENSG00000174407 | 128826 |
| <i>FHL3</i>      | -0.44 | 8.17 | 17.45 | 2.94E-05 | 1.32E-02 | ENSG00000183386 | 2275   |
| <i>PPP1R16A</i>  | -0.56 | 3.63 | 17.28 | 3.23E-05 | 1.40E-02 | ENSG00000160972 | 84988  |
| <i>SPEG</i>      | -0.51 | 7.67 | 17.22 | 3.33E-05 | 1.40E-02 | ENSG00000072195 | 10290  |
| <i>SNAI3</i>     | -0.87 | 2.54 | 16.99 | 3.77E-05 | 1.52E-02 | ENSG00000185669 | 333929 |
| <i>MAP1S</i>     | -0.55 | 1.92 | 16.90 | 3.95E-05 | 1.52E-02 | ENSG00000130479 | 55201  |
| <i>OSBPL7</i>    | -0.40 | 4.04 | 16.88 | 3.99E-05 | 1.52E-02 | ENSG00000006025 | 114881 |
| <i>MTSS1L</i>    | -0.48 | 4.66 | 16.78 | 4.19E-05 | 1.54E-02 | ENSG00000132613 | 92154  |
| <i>MIIP</i>      | -0.43 | 2.76 | 16.73 | 4.31E-05 | 1.54E-02 | ENSG00000116691 | 60672  |
| <i>NEURL1</i>    | -0.40 | 5.58 | 16.65 | 4.48E-05 | 1.56E-02 | ENSG00000107954 | 9148   |
| <i>GNA11</i>     | -0.40 | 4.96 | 16.33 | 5.33E-05 | 1.77E-02 | ENSG00000088256 | 2767   |
| <i>WNK2</i>      | -0.44 | 4.43 | 16.27 | 5.49E-05 | 1.77E-02 | ENSG00000165238 | 65268  |
| <i>MYADML2</i>   | -0.54 | 4.88 | 16.24 | 5.57E-05 | 1.77E-02 | ENSG00000185105 | 255275 |
| <i>TEAD3</i>     | -0.39 | 3.19 | 16.22 | 5.63E-05 | 1.77E-02 | ENSG00000007866 | 7005   |
| <i>C15orf27</i>  | -0.48 | 3.33 | 16.06 | 6.13E-05 | 1.88E-02 | ENSG00000169758 | 123591 |
| <i>FAM53B</i>    | -0.38 | 4.98 | 15.79 | 7.08E-05 | 2.11E-02 | ENSG00000189319 | 9679   |
| <i>RNF126</i>    | -0.48 | 3.02 | 15.69 | 7.45E-05 | 2.11E-02 | ENSG00000070423 | 55658  |
| <i>HEXIM2</i>    | -0.47 | 3.43 | 15.69 | 7.47E-05 | 2.11E-02 | ENSG00000168517 | 124790 |
| <i>AHDC1</i>     | -0.42 | 3.88 | 15.67 | 7.55E-05 | 2.11E-02 | ENSG00000126705 | 27245  |
| <i>RFNG</i>      | -0.41 | 3.17 | 15.52 | 8.18E-05 | 2.23E-02 | ENSG00000169733 | 5986   |
| <i>HMGA1</i>     | -0.38 | 3.80 | 15.34 | 8.98E-05 | 2.29E-02 | ENSG00000137309 | 3159   |
| <i>TFEB</i>      | -0.40 | 4.76 | 15.31 | 9.13E-05 | 2.29E-02 | ENSG00000112561 | 7942   |
| <i>JSRP1</i>     | -0.68 | 4.93 | 14.98 | 1.09E-04 | 2.68E-02 | ENSG00000167476 | 126306 |
| <i>MLF1</i>      | -0.47 | 6.07 | 14.85 | 1.17E-04 | 2.82E-02 | ENSG00000178053 | 4291   |
| <i>ADAMTSL5</i>  | -0.53 | 1.90 | 14.76 | 1.22E-04 | 2.84E-02 | ENSG00000185761 | 339366 |
| <i>ATAD3A</i>    | -0.43 | 2.55 | 14.76 | 1.22E-04 | 2.84E-02 | ENSG00000197785 | 55210  |
| <i>HSPA1A</i>    | -0.35 | 4.61 | 14.43 | 1.45E-04 | 3.27E-02 | ENSG00000204389 | 3303   |

|                     |       |      |       |          |          |                 |        |
|---------------------|-------|------|-------|----------|----------|-----------------|--------|
| <i>MPST</i>         | -0.37 | 3.92 | 14.38 | 1.49E-04 | 3.27E-02 | ENSG00000128309 | 4357   |
| <i>KLHL25</i>       | -0.56 | 2.10 | 14.38 | 1.49E-04 | 3.27E-02 | ENSG00000183655 | 64410  |
| <i>CITED4</i>       | -0.57 | 2.35 | 14.33 | 1.53E-04 | 3.27E-02 | ENSG00000179862 | 163732 |
| <i>MPP7</i>         | -0.28 | 4.96 | 14.27 | 1.59E-04 | 3.27E-02 | ENSG00000150054 | 143098 |
| <i>STEAP3</i>       | -0.34 | 4.55 | 14.18 | 1.67E-04 | 3.32E-02 | ENSG00000115107 | 55240  |
| <i>PCBP4</i>        | -0.34 | 5.14 | 14.13 | 1.71E-04 | 3.35E-02 | ENSG00000090097 | 57060  |
| <i>ST3GAL2</i>      | -0.35 | 4.57 | 14.08 | 1.75E-04 | 3.39E-02 | ENSG00000157350 | 6483   |
| <i>CCDC85B</i>      | -0.62 | 1.44 | 13.90 | 1.93E-04 | 3.64E-02 | ENSG00000175602 | 11007  |
| <i>GLTPD1</i>       | -0.49 | 3.87 | 13.88 | 1.95E-04 | 3.64E-02 | ENSG00000224051 | 80772  |
| <i>RASL12</i>       | -0.38 | 3.90 | 13.85 | 1.98E-04 | 3.64E-02 | ENSG00000103710 | 51285  |
| <i>BTBD2</i>        | -0.40 | 4.17 | 13.80 | 2.03E-04 | 3.64E-02 | ENSG00000133243 | 55643  |
| <i>ZNF787</i>       | -0.48 | 3.18 | 13.79 | 2.05E-04 | 3.64E-02 | ENSG00000142409 | 126208 |
| <i>ZNF784</i>       | -0.39 | 3.18 | 13.70 | 2.15E-04 | 3.69E-02 | ENSG00000179922 | 147808 |
| <i>TBX1</i>         | -0.55 | 2.56 | 13.58 | 2.28E-04 | 3.83E-02 | ENSG00000184058 | 6899   |
| <i>C1orf170</i>     | -0.47 | 6.64 | 13.53 | 2.35E-04 | 3.86E-02 | ENSG00000187642 | 84808  |
| <i>PPP1R3F</i>      | -0.37 | 3.50 | 13.51 | 2.37E-04 | 3.86E-02 | ENSG00000049769 | 89801  |
| <i>ABTB2</i>        | -0.41 | 2.64 | 13.47 | 2.43E-04 | 3.91E-02 | ENSG00000166016 | 25841  |
| <i>FAM47E-STBD1</i> | -0.40 | 3.83 | 13.44 | 2.46E-04 | 3.91E-02 | ENSG00000118804 | 8987   |
| <i>LRP3</i>         | -0.46 | 3.33 | 13.38 | 2.55E-04 | 4.00E-02 | ENSG00000130881 | 4037   |
| <i>MIB2</i>         | -0.52 | 4.90 | 13.32 | 2.63E-04 | 4.08E-02 | ENSG00000197530 | 142678 |
| <i>PPAPDC3</i>      | -0.41 | 6.34 | 13.20 | 2.79E-04 | 4.19E-02 | ENSG00000160539 | 84814  |
| <i>SCRIB</i>        | -0.49 | 3.96 | 13.17 | 2.84E-04 | 4.19E-02 | ENSG00000180900 | 23513  |
| <i>ARX</i>          | -0.53 | 2.02 | 13.14 | 2.89E-04 | 4.19E-02 | ENSG00000004848 | 170302 |
| <i>CCDC85C</i>      | -0.43 | 2.97 | 13.06 | 3.02E-04 | 4.19E-02 | ENSG00000205476 | 317762 |
| <i>ACSL6</i>        | -0.42 | 1.98 | 13.03 | 3.07E-04 | 4.19E-02 | ENSG00000164398 | 23305  |
| <i>FAM195A</i>      | -0.44 | 4.44 | 13.03 | 3.07E-04 | 4.19E-02 | ENSG00000172366 | 84331  |
| <i>TUBB4B</i>       | -0.40 | 5.24 | 13.02 | 3.07E-04 | 4.19E-02 | ENSG00000188229 | 10383  |
| <i>PIK3C2B</i>      | -0.29 | 5.52 | 13.02 | 3.08E-04 | 4.19E-02 | ENSG00000133056 | 5287   |

|                 |       |      |       |          |          |                 |        |
|-----------------|-------|------|-------|----------|----------|-----------------|--------|
| <i>ORAI1</i>    | -0.44 | 3.97 | 13.01 | 3.10E-04 | 4.19E-02 | ENSG00000182500 | 84876  |
| <i>SBK1</i>     | -0.48 | 3.67 | 13.01 | 3.10E-04 | 4.19E-02 | ENSG00000188322 | 388228 |
| <i>ZNF524</i>   | -0.44 | 2.61 | 12.97 | 3.16E-04 | 4.20E-02 | ENSG00000171443 | 147807 |
| <i>P2RY2</i>    | -0.39 | 3.87 | 12.96 | 3.18E-04 | 4.20E-02 | ENSG00000175591 | 5029   |
| <i>ACHE</i>     | -0.63 | 5.10 | 12.91 | 3.26E-04 | 4.23E-02 | ENSG00000087085 | 43     |
| <i>HSF1</i>     | -0.34 | 5.32 | 12.88 | 3.33E-04 | 4.23E-02 | ENSG00000185122 | 3297   |
| <i>CLUH</i>     | -0.39 | 5.78 | 12.87 | 3.34E-04 | 4.23E-02 | ENSG00000132361 | 23277  |
| <i>GPC1</i>     | -0.44 | 5.43 | 12.85 | 3.37E-04 | 4.23E-02 | ENSG00000063660 | 2817   |
| <i>RBM38</i>    | -0.48 | 6.15 | 12.81 | 3.45E-04 | 4.29E-02 | ENSG00000132819 | 55544  |
| <i>RXRA</i>     | -0.35 | 6.40 | 12.79 | 3.49E-04 | 4.30E-02 | ENSG00000186350 | 6256   |
| <i>RRAD</i>     | -0.72 | 5.67 | 12.69 | 3.67E-04 | 4.47E-02 | ENSG00000166592 | 6236   |
| <i>C11orf89</i> | -0.57 | 2.87 | 12.63 | 3.80E-04 | 4.50E-02 | ENSG00000184682 | NA     |
| <i>ADRM1</i>    | -0.37 | 5.14 | 12.63 | 3.80E-04 | 4.50E-02 | ENSG00000130706 | 11047  |
| <i>PDGFA</i>    | -0.39 | 3.14 | 12.47 | 4.14E-04 | 4.70E-02 | ENSG00000197461 | 5154   |
| <i>SEMA6C</i>   | -0.34 | 6.86 | 12.46 | 4.15E-04 | 4.70E-02 | ENSG00000143434 | 10500  |
| <i>EPN1</i>     | -0.37 | 4.34 | 12.40 | 4.30E-04 | 4.70E-02 | ENSG00000063245 | 29924  |
| <i>SH2B2</i>    | -0.53 | 1.90 | 12.38 | 4.34E-04 | 4.70E-02 | ENSG00000160999 | 10603  |
| <i>PLEKHO1</i>  | -0.29 | 4.27 | 12.38 | 4.35E-04 | 4.70E-02 | ENSG00000023902 | 51177  |
| <i>UPB1</i>     | -0.61 | 0.33 | 12.36 | 4.40E-04 | 4.70E-02 | ENSG00000100024 | 51733  |
| <i>MACROD1</i>  | -0.40 | 6.20 | 12.35 | 4.41E-04 | 4.70E-02 | ENSG00000133315 | 28992  |

**Table S3C.** Upregulated gene transcripts in subcutaneous adipose tissue after sleep loss compared with normal sleep.

| <b>Gene name</b> | <b>log fc</b> | <b>log cpm</b> | <b>LR</b> | <b>P-value</b> | <b>FDR</b> | <b>Ensembl gene id</b> | <b>Entrez id</b> |
|------------------|---------------|----------------|-----------|----------------|------------|------------------------|------------------|
| <i>ADRB1</i>     | 0.91          | 3.85           | 37.55     | 8.90E-10       | 1.25E-05   | ENSG00000043591        | 153              |
| <i>GLYCTK</i>    | 0.36          | 4.92           | 27.53     | 1.54E-07       | 5.44E-04   | ENSG00000168237        | 132158           |
| <i>SYTL3</i>     | 0.39          | 4.13           | 24.86     | 6.16E-07       | 9.97E-04   | ENSG00000164674        | 94120            |
| <i>NET1</i>      | 0.64          | 7.82           | 24.86     | 6.16E-07       | 9.97E-04   | ENSG00000173848        | 10276            |
| <i>ATP10A</i>    | 0.31          | 4.81           | 23.56     | 1.21E-06       | 1.40E-03   | ENSG00000206190        | 57194            |
| <i>RGS3</i>      | 0.66          | 7.00           | 23.35     | 1.35E-06       | 1.40E-03   | ENSG00000138835        | 5998             |
| <i>C5orf30</i>   | 1.15          | 5.31           | 23.30     | 1.39E-06       | 1.40E-03   | ENSG00000181751        | 90355            |
| <i>NOD1</i>      | 0.39          | 5.55           | 23.06     | 1.57E-06       | 1.47E-03   | ENSG00000106100        | 10392            |
| <i>VEGFA</i>     | 0.44          | 8.09           | 22.07     | 2.63E-06       | 2.24E-03   | ENSG00000112715        | 7422             |
| <i>ARHGAP24</i>  | 0.29          | 6.25           | 21.28     | 3.96E-06       | 2.79E-03   | ENSG00000138639        | 83478            |
| <i>PPP2R1B</i>   | 0.37          | 8.80           | 20.08     | 7.42E-06       | 4.63E-03   | ENSG00000137713        | 5519             |
| <i>IL1RAP</i>    | 0.60          | 3.86           | 20.05     | 7.56E-06       | 4.63E-03   | ENSG00000196083        | 3556             |
| <i>SLC19A3</i>   | 0.36          | 9.19           | 19.96     | 7.91E-06       | 4.65E-03   | ENSG00000135917        | 80704            |
| <i>ID4</i>       | 0.53          | 5.08           | 19.75     | 8.82E-06       | 4.97E-03   | ENSG00000172201        | 3400             |
| <i>LRRN3</i>     | 0.58          | 4.34           | 19.16     | 1.20E-05       | 6.06E-03   | ENSG00000173114        | 54674            |
| <i>MAP3K8</i>    | 0.51          | 4.70           | 18.53     | 1.67E-05       | 7.59E-03   | ENSG00000107968        | 1326             |
| <i>C10orf10</i>  | 0.75          | 9.03           | 18.41     | 1.78E-05       | 7.84E-03   | ENSG00000165507        | 11067            |
| <i>LUZP2</i>     | 0.53          | 3.49           | 18.32     | 1.86E-05       | 7.96E-03   | ENSG00000187398        | 338645           |
| <i>HTRA3</i>     | 0.35          | 6.06           | 18.08     | 2.11E-05       | 8.51E-03   | ENSG00000170801        | 94031            |
| <i>PTGER4</i>    | 0.33          | 4.17           | 17.99     | 2.22E-05       | 8.70E-03   | ENSG00000171522        | 5734             |
| <i>RPH3AL</i>    | 0.28          | 4.01           | 17.49     | 2.89E-05       | 1.04E-02   | ENSG00000181031        | 9501             |
| <i>FOSL2</i>     | 0.38          | 6.92           | 17.44     | 2.96E-05       | 1.04E-02   | ENSG00000075426        | 2355             |
| <i>ZFAND5</i>    | 0.44          | 8.74           | 17.26     | 3.27E-05       | 1.12E-02   | ENSG00000107372        | 7763             |
| <i>GRHL1</i>     | 0.85          | 2.93           | 17.22     | 3.32E-05       | 1.12E-02   | ENSG00000134317        | 29841            |
| <i>THBS2</i>     | 0.32          | 5.76           | 17.03     | 3.68E-05       | 1.18E-02   | ENSG00000186340        | 7058             |
| <i>ENG</i>       | 0.31          | 6.22           | 16.66     | 4.47E-05       | 1.37E-02   | ENSG00000106991        | 2022             |
| <i>MOCS1</i>     | 0.21          | 7.44           | 16.62     | 4.58E-05       | 1.37E-02   | ENSG00000124615        | 4337             |
| <i>NDUFS7</i>    | 0.29          | 4.85           | 16.23     | 5.60E-05       | 1.61E-02   | ENSG00000115286        | 374291           |
| <i>PHLPP1</i>    | 0.25          | 5.93           | 16.00     | 6.34E-05       | 1.79E-02   | ENSG00000081913        | 23239            |
| <i>ADAMTS16</i>  | 0.44          | 2.36           | 15.69     | 7.45E-05       | 2.06E-02   | ENSG00000145536        | 170690           |

|                 |      |      |       |          |          |                 |        |
|-----------------|------|------|-------|----------|----------|-----------------|--------|
| <i>MAP3K13</i>  | 0.46 | 4.86 | 15.24 | 9.46E-05 | 2.42E-02 | ENSG00000073803 | 9175   |
| <i>TWIST1</i>   | 0.24 | 5.52 | 15.17 | 9.80E-05 | 2.47E-02 | ENSG00000122691 | 7291   |
| <i>TLR4</i>     | 0.24 | 6.92 | 15.05 | 1.05E-04 | 2.54E-02 | ENSG00000136869 | 7099   |
| <i>DDR1</i>     | 0.40 | 5.35 | 14.72 | 1.25E-04 | 2.98E-02 | ENSG00000204580 | 780    |
| <i>RARB</i>     | 0.53 | 2.30 | 14.55 | 1.37E-04 | 3.10E-02 | ENSG00000077092 | 5915   |
| <i>GPCPD1</i>   | 0.25 | 7.03 | 14.43 | 1.45E-04 | 3.19E-02 | ENSG00000125772 | 56261  |
| <i>ISM1</i>     | 0.45 | 2.42 | 14.41 | 1.47E-04 | 3.19E-02 | ENSG00000101230 | 140862 |
| <i>ABCA2</i>    | 0.25 | 6.14 | 14.41 | 1.47E-04 | 3.19E-02 | ENSG00000107331 | 20     |
| <i>ARHGEF26</i> | 0.37 | 5.50 | 14.32 | 1.54E-04 | 3.25E-02 | ENSG00000114790 | 26084  |
| <i>ARL4D</i>    | 0.48 | 1.86 | 14.29 | 1.57E-04 | 3.25E-02 | ENSG00000175906 | 379    |
| <i>SPON2</i>    | 0.29 | 4.52 | 14.21 | 1.64E-04 | 3.35E-02 | ENSG00000159674 | 10417  |
| <i>THBD</i>     | 0.42 | 3.53 | 14.13 | 1.70E-04 | 3.40E-02 | ENSG00000178726 | 7056   |
| <i>STAB1</i>    | 0.29 | 7.73 | 14.12 | 1.71E-04 | 3.40E-02 | ENSG00000010327 | 23166  |
| <i>KIF26A</i>   | 0.29 | 4.28 | 13.96 | 1.87E-04 | 3.55E-02 | ENSG00000066735 | 26153  |
| <i>ARHGEF3</i>  | 0.45 | 5.11 | 13.92 | 1.90E-04 | 3.55E-02 | ENSG00000163947 | 50650  |
| <i>TM7SF2</i>   | 0.27 | 6.47 | 13.74 | 2.10E-04 | 3.76E-02 | ENSG00000149809 | 7108   |
| <i>FBLN2</i>    | 0.23 | 9.11 | 13.73 | 2.11E-04 | 3.76E-02 | ENSG00000163520 | 2199   |
| <i>TP53I3</i>   | 0.31 | 3.95 | 13.51 | 2.38E-04 | 4.08E-02 | ENSG00000115129 | 9540   |
| <i>RDH5</i>     | 0.26 | 5.98 | 13.41 | 2.50E-04 | 4.25E-02 | ENSG00000135437 | 5959   |
| <i>FBXW5</i>    | 0.22 | 6.26 | 13.35 | 2.59E-04 | 4.34E-02 | ENSG00000159069 | 54461  |
| <i>C8orf4</i>   | 0.32 | 4.20 | 13.24 | 2.74E-04 | 4.49E-02 | ENSG00000176907 | 56892  |
| <i>RDH10</i>    | 0.39 | 5.77 | 13.24 | 2.75E-04 | 4.49E-02 | ENSG00000121039 | 157506 |
| <i>CD14</i>     | 0.35 | 5.10 | 13.22 | 2.77E-04 | 4.49E-02 | ENSG00000170458 | 929    |
| <i>TIMM13</i>   | 0.21 | 4.48 | 13.19 | 2.82E-04 | 4.51E-02 | ENSG00000099800 | 26517  |
| <i>GPBAR1</i>   | 0.47 | 2.47 | 13.06 | 3.02E-04 | 4.71E-02 | ENSG00000179921 | 151306 |
| <i>KLHDC7A</i>  | 0.74 | 1.86 | 13.01 | 3.10E-04 | 4.75E-02 | ENSG00000179023 | 127707 |
| <i>ABHD5</i>    | 0.30 | 6.66 | 12.89 | 3.30E-04 | 4.97E-02 | ENSG00000011198 | 51099  |
| <i>MYEOV</i>    | 0.50 | 1.97 | 12.88 | 3.31E-04 | 4.97E-02 | ENSG00000172927 | 26579  |
| <i>GPX1</i>     | 0.26 | 7.57 | 12.82 | 3.43E-04 | 4.98E-02 | ENSG00000233276 | 2876   |
| <i>F3</i>       | 0.42 | 6.58 | 12.82 | 3.43E-04 | 4.98E-02 | ENSG00000117525 | 2152   |

**Table S3D.** Downregulated gene transcripts in subcutaneous adipose tissue after sleep loss compared with normal sleep.

| <b>Gene name</b> | <b>Log<br/>fc</b> | <b>Log<br/>cpm</b> | <b>LR</b> | <b>P-value</b> | <b>Q-value</b> | <b>Ensembl gene id</b> | <b>Entrez id</b> |
|------------------|-------------------|--------------------|-----------|----------------|----------------|------------------------|------------------|
| <i>LONRF1</i>    | -0.46             | 6.69               | 34.40     | 4.49E-09       | 3.17E-05       | ENSG00000154359        | 91694            |
| <i>DES</i>       | -1.61             | 2.08               | 28.93     | 7.51E-08       | 3.53E-04       | ENSG00000175084        | 1674             |
| <i>CPEB4</i>     | -0.25             | 6.87               | 25.76     | 3.86E-07       | 9.97E-04       | ENSG00000113742        | 80315            |
| <i>SIX1</i>      | -0.59             | 6.09               | 24.66     | 6.84E-07       | 9.97E-04       | ENSG00000126778        | 6495             |
| <i>SIX4</i>      | -0.48             | 4.00               | 24.65     | 6.89E-07       | 9.97E-04       | ENSG00000100625        | 51804            |
| <i>MAGI1</i>     | -0.31             | 7.59               | 24.60     | 7.07E-07       | 9.97E-04       | ENSG00000151276        | 9223             |
| <i>NHS</i>       | -0.34             | 5.13               | 23.55     | 1.22E-06       | 1.40E-03       | ENSG00000188158        | 4810             |
| <i>AXIN2</i>     | -0.86             | 4.10               | 21.97     | 2.77E-06       | 2.24E-03       | ENSG00000168646        | 8313             |
| <i>FHOD3</i>     | -0.47             | 4.25               | 21.90     | 2.87E-06       | 2.24E-03       | ENSG00000134775        | 80206            |
| <i>LARGE</i>     | -0.33             | 5.65               | 21.30     | 3.93E-06       | 2.79E-03       | ENSG00000133424        | 9215             |
| <i>PCF11</i>     | -0.22             | 7.12               | 20.67     | 5.44E-06       | 3.65E-03       | ENSG00000165494        | 51585            |
| <i>C12orf23</i>  | -0.26             | 5.35               | 19.23     | 1.16E-05       | 6.06E-03       | ENSG00000151135        | 90488            |
| <i>CCL14</i>     | -0.59             | 3.35               | 19.18     | 1.19E-05       | 6.06E-03       | ENSG00000213494        | 6358             |
| <i>FSTL3</i>     | -0.41             | 5.69               | 18.88     | 1.39E-05       | 6.62E-03       | ENSG00000070404        | 10272            |
| <i>RASD1</i>     | -0.76             | 7.07               | 18.86     | 1.41E-05       | 6.62E-03       | ENSG00000108551        | 51655            |
| <i>BCL6</i>      | -0.26             | 8.06               | 18.23     | 1.96E-05       | 8.11E-03       | ENSG00000113916        | 604              |
| <i>JPH2</i>      | -0.77             | 2.17               | 17.92     | 2.30E-05       | 8.77E-03       | ENSG00000149596        | 57158            |
| <i>CLTCL1</i>    | -0.28             | 5.03               | 17.63     | 2.68E-05       | 9.95E-03       | ENSG00000070371        | 8218             |
| <i>SLC38A2</i>   | -0.29             | 7.89               | 17.15     | 3.45E-05       | 1.13E-02       | ENSG00000134294        | 54407            |
| <i>HILPDA</i>    | -0.61             | 6.42               | 16.69     | 4.40E-05       | 1.37E-02       | ENSG00000135245        | 29923            |
| <i>ARFGAP3</i>   | -0.18             | 5.47               | 16.38     | 5.17E-05       | 1.52E-02       | ENSG00000242247        | 26286            |
| <i>BHMT</i>      | -0.72             | 0.66               | 15.58     | 7.93E-05       | 2.15E-02       | ENSG00000145692        | 635              |
| <i>KCNK2</i>     | -0.73             | 1.06               | 15.50     | 8.26E-05       | 2.20E-02       | ENSG00000082482        | 3776             |
| <i>ENOX1</i>     | -0.39             | 4.06               | 15.31     | 9.14E-05       | 2.39E-02       | ENSG00000120658        | 55068            |
| <i>PTBP2</i>     | -0.22             | 6.00               | 15.14     | 9.99E-05       | 2.47E-02       | ENSG00000117569        | 58155            |
| <i>ESR1</i>      | -0.33             | 5.63               | 14.67     | 1.28E-04       | 2.98E-02       | ENSG00000091831        | 2099             |
| <i>TSKU</i>      | -0.52             | 7.50               | 14.66     | 1.29E-04       | 2.98E-02       | ENSG00000182704        | 25987            |
| <i>MYBPC1</i>    | -1.12             | 1.99               | 14.31     | 1.55E-04       | 3.25E-02       | ENSG00000196091        | 4604             |
| <i>TIPARP</i>    | -0.23             | 5.58               | 14.08     | 1.75E-04       | 3.42E-02       | ENSG00000163659        | 25976            |
| <i>IP6K3</i>     | -1.35             | -0.05              | 14.00     | 1.83E-04       | 3.53E-02       | ENSG00000161896        | 117283           |

|                |       |      |       |          |          |                 |       |
|----------------|-------|------|-------|----------|----------|-----------------|-------|
| <i>DDIT3</i>   | -0.33 | 4.85 | 13.91 | 1.91E-04 | 3.55E-02 | ENSG00000175197 | 1649  |
| <i>TOB2</i>    | -0.33 | 7.16 | 13.82 | 2.01E-04 | 3.67E-02 | ENSG00000183864 | 10766 |
| <i>TMEM100</i> | -0.36 | 5.55 | 13.65 | 2.20E-04 | 3.87E-02 | ENSG00000166292 | 55273 |
| <i>ARID3A</i>  | -0.31 | 4.66 | 13.53 | 2.35E-04 | 4.08E-02 | ENSG00000116017 | 1820  |
| <i>MYH7</i>    | -1.07 | 2.17 | 13.10 | 2.95E-04 | 4.67E-02 | ENSG00000092054 | 4625  |
| <i>ITPKC</i>   | -0.23 | 5.44 | 13.05 | 3.04E-04 | 4.71E-02 | ENSG00000086544 | 80271 |
| <i>ZNF395</i>  | -0.18 | 6.01 | 12.85 | 3.38E-04 | 4.98E-02 | ENSG00000186918 | 55893 |

**Table S4. Altered pathways and transcription factors based on RNA-seq data from skeletal muscle and subcutaneous adipose tissue in response to acute sleep loss compared with normal sleep. (A-D)** Lists KEGG pathways that are enriched based on gene set enrichment analysis (GSEA) of mRNA transcripts that were (A) upregulated or (B) downregulated in skeletal muscle, as well as (C) upregulated or (D) downregulated in subcutaneous adipose tissue after sleep loss compared with after sleep. Also listed are: the mean statistical value (Stat mean), adjusted P-value (q value) and set size of a given pathway, *i.e.* the number of genes included in the gene set test. (E-F) *In silico* ChIP enrichment analysis in skeletal muscle and subcutaneous adipose tissue in response to acute sleep loss. Analysis done against the ChEA database (63), based on genes upregulated in (E) skeletal muscle or (F) subcutaneous adipose tissue in response to sleep loss compared with sleep. Showing pathways with adjusted P-value (q-value, FDR) below 0.05; also displaying information on the experiment on which the information is based and the overlap of target genes for a given transcription factor; as well as Z-scores and the significant differentially expressed genes for each tissue that contribute to the overlap.

| <b>Table S4A.</b> Upregulated KEGG pathways in skeletal muscle based on RNA-seq in response to acute sleep loss compared with normal sleep. |                  |                |                 |
|---------------------------------------------------------------------------------------------------------------------------------------------|------------------|----------------|-----------------|
| <b>Pathway</b>                                                                                                                              | <b>Stat mean</b> | <b>q-value</b> | <b>Set size</b> |
| hsa04610 Complement and coagulation cascades                                                                                                | 0.46             | 0.00001        | 39              |
| hsa04520 Adherens junction                                                                                                                  | 0.32             | 0.00015        | 62              |
| hsa04512 ECM-receptor interaction                                                                                                           | 0.31             | 0.00015        | 66              |
| hsa04810 Regulation of actin cytoskeleton                                                                                                   | 0.18             | 0.0011         | 167             |
| hsa04666 Fc gamma R-mediated phagocytosis                                                                                                   | 0.24             | 0.0045         | 80              |
| hsa04510 Focal adhesion                                                                                                                     | 0.15             | 0.011          | 176             |
| hsa04630 Jak-STAT signaling pathway                                                                                                         | 0.2              | 0.018          | 88              |
| hsa04110 Cell cycle                                                                                                                         | 0.19             | 0.024          | 93              |
| hsa00140 Steroid hormone biosynthesis                                                                                                       | 0.46             | 0.041          | 14              |
| hsa04974 Protein digestion and absorption                                                                                                   | 0.25             | 0.043          | 45              |
| hsa04670 Leukocyte transendothelial migration                                                                                               | 0.19             | 0.043          | 84              |

| <b>Table S4B.</b> Downregulated KEGG pathways based on RNA-seq in skeletal muscle in response to acute sleep loss compared with normal sleep. |                  |                |                 |
|-----------------------------------------------------------------------------------------------------------------------------------------------|------------------|----------------|-----------------|
| <b>Pathway</b>                                                                                                                                | <b>Stat mean</b> | <b>q-value</b> | <b>Set size</b> |
| hsa03010 Ribosome                                                                                                                             | 0.58             | 0.00E+00       | 85              |
| hsa00190 Oxidative phosphorylation                                                                                                            | 0.39             | 0.00E+00       | 117             |
| hsa03050 Proteasome                                                                                                                           | 0.46             | 1.40E-06       | 41              |



|                                     |      |          |     |
|-------------------------------------|------|----------|-----|
| hsa04260 Cardiac muscle contraction | 0.33 | 4.00E-05 | 62  |
| hsa03040 Spliceosome                | 0.23 | 6.80E-05 | 123 |
| hsa03013 RNA transport              | 0.18 | 5.00E-03 | 136 |
| hsa03410 Base excision repair       | 0.32 | 4.50E-02 | 31  |

**Table S4C.** Upregulated KEGG pathways based on RNA-seq in subcutaneous adipose tissue in response to acute sleep loss compared with normal sleep.

| <b>Pathway</b>                                      | <b>Stat mean</b> | <b>q-value</b> | <b>Set size</b> |
|-----------------------------------------------------|------------------|----------------|-----------------|
| hsa00190 Oxidative phosphorylation                  | 0.41             | 0.00E+00       | 119             |
| hsa03010 Ribosome                                   | 0.31             | 9.20E-06       | 84              |
| hsa00280 Valine, leucine and isoleucine degradation | 0.42             | 2.10E-05       | 41              |
| hsa00620 Pyruvate metabolism                        | 0.36             | 4.30E-03       | 34              |
| hsa04380 Osteoclast differentiation                 | 0.2              | 4.30E-03       | 114             |
| hsa00640 Propanoate metabolism                      | 0.38             | 4.30E-03       | 30              |
| hsa00020 Citrate cycle (TCA cycle)                  | 0.39             | 4.80E-03       | 28              |
| hsa00360 Phenylalanine metabolism                   | 0.64             | 4.80E-03       | 10              |
| hsa04145 Phagosome                                  | 0.18             | 4.80E-03       | 124             |
| hsa00380 Tryptophan metabolism                      | 0.37             | 4.80E-03       | 30              |
| hsa04260 Cardiac muscle contraction                 | 0.27             | 4.80E-03       | 54              |
| hsa04610 Complement and coagulation cascades        | 0.3              | 4.80E-03       | 45              |
| hsa04620 Toll-like receptor signaling pathway       | 0.22             | 4.80E-03       | 81              |
| hsa00071 Fatty acid metabolism                      | 0.32             | 6.50E-03       | 36              |
| hsa04630 Jak-STAT signaling pathway                 | 0.19             | 9.50E-03       | 97              |
| hsa00630 Glyoxylate and dicarboxylate metabolism    | 0.46             | 1.00E-02       | 16              |
| hsa01040 Biosynthesis of unsaturated fatty acids    | 0.41             | 1.10E-02       | 20              |
| hsa04122 Sulfur relay system                        | 0.56             | 1.60E-02       | 10              |

|                                       |      |          |    |
|---------------------------------------|------|----------|----|
| hsa00410 beta-Alanine metabolism      | 0.41 | 1.70E-02 | 18 |
| hsa00010 Glycolysis / Gluconeogenesis | 0.25 | 2.00E-02 | 46 |
| hsa00030 Pentose phosphate pathway    | 0.36 | 2.90E-02 | 21 |
| hsa04975 Fat digestion and absorption | 0.33 | 4.00E-02 | 24 |
| hsa00830 Retinol metabolism           | 0.35 | 4.60E-02 | 21 |

**Table S4D.** Downregulated KEGG pathways based on RNA-seq in subcutaneous adipose tissue in response to acute sleep loss compared with normal sleep.

| <b>Pathway</b>         | <b>Stat mean</b> | <b>q-value</b> | <b>Set size</b> |
|------------------------|------------------|----------------|-----------------|
| hsa03040 Spliceosome   | 0.23             | 0.00026        | 124             |
| hsa03013 RNA transport | 0.21             | 0.00026        | 139             |
| hsa03050 Proteasome    | 0.31             | 0.024          | 41              |

| <b>Table S4E.</b> ChIP Enrichment Analysis based on genes <i>upregulated</i> in skeletal muscle in response to sleep loss. |                |                |                |                       |              |                                                                  |
|----------------------------------------------------------------------------------------------------------------------------|----------------|----------------|----------------|-----------------------|--------------|------------------------------------------------------------------|
| <b>Term</b>                                                                                                                | <b>Overlap</b> | <b>Q-value</b> | <b>Z-score</b> | <b>Combined Score</b> | <b>Genes</b> |                                                                  |
| PPARG_20176806_ChIP-Seq_3T3-L1_Mouse                                                                                       | 9/1807         | 0.01221        | 1.59128        | 16.78399              | -            | KANK1; CPT1A; NNMT; PFKFB3; PPP2R1B; FZD5; PDK4; TXNIP; TMEM154  |
| LXR_22158963_ChIP-Seq_LIVER_Mouse                                                                                          | 9/2000         | 0.01375        | 1.42086        | 13.83293              | -            | USP6NL; CPT1A; NNMT; PFKFB3; PPP2R1B; FZD5; PDK4; TXNIP; TMEM154 |

| <b>Table S4F.</b> ChIP Enrichment Analysis based on genes <i>upregulated</i> in subcutaneous adipose tissue in response to sleep loss. |                |                |                |                       |              |                                                                                                                                      |
|----------------------------------------------------------------------------------------------------------------------------------------|----------------|----------------|----------------|-----------------------|--------------|--------------------------------------------------------------------------------------------------------------------------------------|
| <b>Term</b>                                                                                                                            | <b>Overlap</b> | <b>Q-value</b> | <b>Z-score</b> | <b>Combined Score</b> | <b>Genes</b> |                                                                                                                                      |
| SMC1_22415368_ChIP-Seq_MEFs_Mouse                                                                                                      | 19/2000        | 0.00197        | 1.49300        | 18.82215              | -            | DDR1; ABCA2; SPON2; RPH3AL; PHLPP1; LRRN3; HTRA3; TWIST1; NOD1; F3; FOSL2; ADAMTS16; THBD; NDUFS7; KIF26A; RDH10; RARB; RDH5; MAP3K8 |
| CEBPD_21427703_ChIP-Seq_3T3-L1_Mouse                                                                                                   | 16/1735        | 0.01063        | 1.58170        | 16.17996              | -            | HTRA3; ZFAND5; TWIST1; ATP10A; IL1RAP; ABHD5; ISM1; THBS2; SYTL3; ARHGAP24; VEGFA; FOSL2; ADAMTS16; ARL4D; THBD; RDH10               |
| FOXA1_25552417_ChIP-Seq_VCAP_Human                                                                                                     | 17/2000        | 0.01071        | 1.48179        | 14.54640              | -            | DDR1; PTGER4; RPH3AL; GLYCTK; TIMM13; C8ORF4; NOD1; ADRB1; GRHL1; GPCPD1; FOSL2; TM7SF2; THBD; ID4; RARB; MAP3K13; C5ORF30           |
| RELA_24523406_ChIP-Seq_FIBROSARCOMA_Human                                                                                              | 12/1182        | 0.02311        | 1.71996        | 14.91658              | -            | DDR1; PTGER4; RPH3AL; TP53I3; KIF26A; TWIST1; RDH5; MAP3K8; THBS2; F3; FOSL2; ENG                                                    |
| TCF21_26020271_ChIP-Seq_SMOOTH_MUSCLE_Human                                                                                            | 16/2000        | 0.02311        | 1.55391        | 13.26517              | -            | PTGER4; HTRA3; MYEOV; C10ORF10; TIMM13; GPBAR1; FBLN2; SYTL3; VEGFA; FOSL2; ADAMTS16; THBD; RGS3; ID4; RDH5; MAP3K8                  |
| WDR5_24793694_ChIP-Seq_LNCAP_Human                                                                                                     | 9/757          | 0.03502        | 2.48331        | 19.43986              | -            | PTGER4; NDUFS7; PPP2R1B; RDH10; TIMM13; ABHD5; FOSL2; ENG; TM7SF2                                                                    |

|                                     |         |         |         |   |          |                                                                                                                                                                                  |
|-------------------------------------|---------|---------|---------|---|----------|----------------------------------------------------------------------------------------------------------------------------------------------------------------------------------|
| SUZ12_20075857_ChIP-Seq_MESCs_Mouse | 25/4356 | 0.03502 | 0.87692 | - | 6.82635  | DDR1; PTGER4; PHLPP1; LUZP2; HTRA3; TWIST1; ATP10A; NOD1; ADRB1; IL1RAP; ABHD5; ISM1; ADAMTS16; THBD; RDH10; MAP3K8; CD14; ABCA2; RPH3AL; F3; ARHGAP24; FOSL2; KIF26A; ID4; RARB |
| SMAD3_21741376_ChIP-Seq_ESCs_Human  | 15/2000 | 0.04798 | 1.59917 | - | 11.73154 | DDR1; RPH3AL; MYEOV; TIMM13; KLHDC7A; ABHD5; ISM1; VEGFA; FOSL2; ADAMTS16; NDUFS7; ID4; RARB; MOCS1; TLR4                                                                        |

**Table S5. Enriched pathways based on proteomic analyses of skeletal muscle tissue in response to acute sleep loss compared with normal sleep.** Lists KEGG pathways that are enriched based on mass spectrometry-based proteomic identification of proteins that were significantly (**A**) upregulated or (**B**) downregulated (in their abundance) in skeletal muscle, after sleep loss compared with after sleep. Listing the KEGG pathways, the total number of elements in each pathway ("N"), the number of proteins of a given pathway that were differentially expressed ("DE"), and the FDR-adjusted p value (q value) for the pathway in response to sleep loss. See also Fig. 3 in main text.

| <b>Table S5A.</b> Enriched KEGG pathways based on proteins with <i>increased</i> abundance in skeletal muscle after sleep loss compared with after sleep |          |           |                |
|----------------------------------------------------------------------------------------------------------------------------------------------------------|----------|-----------|----------------|
| <b>KEGG pathway</b>                                                                                                                                      | <b>N</b> | <b>DE</b> | <b>q value</b> |
| Cysteine and methionine metabolism                                                                                                                       | 10       | 2         | 1.89E-03       |
| Apoptosis - multiple species                                                                                                                             | 2        | 1         | 1.43E-02       |
| Sulfur metabolism                                                                                                                                        | 2        | 1         | 1.43E-02       |
| Sulfur relay system                                                                                                                                      | 2        | 1         | 1.43E-02       |
| IL-17 signaling pathway                                                                                                                                  | 3        | 1         | 2.14E-02       |
| p53 signaling pathway                                                                                                                                    | 3        | 1         | 2.14E-02       |
| Th17 cell differentiation                                                                                                                                | 4        | 1         | 2.85E-02       |
| Pathways in cancer                                                                                                                                       | 48       | 2         | 4.19E-02       |
| Progesterone-mediated oocyte maturation                                                                                                                  | 7        | 1         | 4.94E-02       |

| <b>Table S5B.</b> Enriched KEGG pathways based on proteins with <i>decreased</i> abundance in skeletal muscle after sleep loss compared with after sleep |          |           |                |
|----------------------------------------------------------------------------------------------------------------------------------------------------------|----------|-----------|----------------|
| <b>KEGG pathway</b>                                                                                                                                      | <b>N</b> | <b>DE</b> | <b>q value</b> |
| Glycolysis / Gluconeogenesis                                                                                                                             | 32       | 6         | 2.78E-06       |
| Fructose and mannose metabolism                                                                                                                          | 8        | 3         | 1.58E-04       |
| Pentose phosphate pathway                                                                                                                                | 11       | 3         | 4.54E-04       |
| Biosynthesis of amino acids                                                                                                                              | 30       | 4         | 7.76E-04       |
| Central carbon metabolism in cancer                                                                                                                      | 14       | 3         | 9.75E-04       |
| Carbon metabolism                                                                                                                                        | 64       | 5         | 1.80E-03       |
| Parathyroid hormone synthesis, secretion and action                                                                                                      | 5        | 2         | 2.18E-03       |
| HIF-1 signaling pathway                                                                                                                                  | 20       | 3         | 2.89E-03       |
| Glucagon signaling pathway                                                                                                                               | 30       | 3         | 9.40E-03       |
| Wnt signaling pathway                                                                                                                                    | 13       | 2         | 1.59E-02       |
| Chemokine signaling pathway                                                                                                                              | 14       | 2         | 1.83E-02       |
| AMPK signaling pathway                                                                                                                                   | 16       | 2         | 2.38E-02       |
| Tight junction                                                                                                                                           | 45       | 3         | 2.86E-02       |

|                                    |    |   |          |
|------------------------------------|----|---|----------|
| Hedgehog signaling pathway         | 2  | 1 | 3.09E-02 |
| Taste transduction                 | 2  | 1 | 3.09E-02 |
| Type II diabetes mellitus          | 2  | 1 | 3.09E-02 |
| Purine metabolism                  | 19 | 2 | 3.30E-02 |
| Ras signaling pathway              | 21 | 2 | 3.98E-02 |
| Vascular smooth muscle contraction | 21 | 2 | 3.98E-02 |
| Pyruvate metabolism                | 22 | 2 | 4.34E-02 |
| Cocaine addiction                  | 3  | 1 | 4.60E-02 |
| Cortisol synthesis and secretion   | 3  | 1 | 4.60E-02 |

**Table S6. Changes in serum, skeletal muscle, and subcutaneous adipose tissue metabolites in response to acute sleep loss.** (A) Analysis of variance (ANOVA) results, and (B) log<sub>2</sub> fold changes for *serum* metabolites identified by gas chromatography-based mass spectrometry (GCMS). The analysis is based on a comparison of metabolite levels in samples after sleep loss compared with values obtained after normal sleep (*Wake* effect), for baseline vs. post-oral glucose tolerance (OGTT) values (*Time* effect in (A)). Log<sub>2</sub> fold changes comparing sleep loss with sleep (wake:sleep) in (B-D) are shown as mean ± S.E.M across the analyzed subjects, and were analyzed with two-sided t-tests. Only significant values or statistical trends are shown: significant values (P<0.05) are shown in italic bold font; trends (0.05<P<0.10) in bold font. Names of metabolites with significant or statistical trends for main effects of *Wake* have been indicated in italic bold or bold, respectively, whereas blank fields indicate metabolites with P>0.10. n=15 pairs for all analyses. (C) Changes in metabolites identified by GCMS, in response to acute sleep loss, was also investigated in skeletal muscle (n=13 pairs) and (D) subcutaneous adipose tissue d, from vastus lateralis muscle and subcutaneous adipose tissue biopsy samples, respectively, obtained in the fasting state after both sleep loss and after normal sleep.

**Table S6A. ANOVA results for *serum* metabolites analyzed in the fasting and post-OGTT state after sleep loss and after normal sleep.**

| Metabolite name                         | <i>Wake</i> effect | <i>Time</i> effect | Interaction ( <i>Wake*Time</i> ) effect |
|-----------------------------------------|--------------------|--------------------|-----------------------------------------|
| 1-palmitoyl-sn-glycero-3-phosphocholine |                    | <i>0.023</i>       |                                         |
| <b><i>1,5-anhydro-d-glucitol</i></b>    | <i>0.028</i>       | <i>0.006</i>       |                                         |
| 2-aminobutyric acid                     |                    |                    |                                         |
| <b><i>2-oxoisocaproic acid</i></b>      | <i>0.096</i>       | <i>0.000</i>       |                                         |
| <b><i>3-hydroxybutyric acid</i></b>     | <i>0.097</i>       | <i>0.000</i>       | <i>0.046</i>                            |
| Adenosine                               |                    |                    |                                         |
| Alanine                                 |                    |                    |                                         |
| Alpha-tocopherol                        |                    | <i>0.005</i>       |                                         |
| Arabitol                                |                    |                    | <i>0.091</i>                            |
| Campesterol                             |                    |                    |                                         |
| Citric acid                             |                    | <i>0.000</i>       |                                         |
| <b><i>Creatinine</i></b>                | <i>0.002</i>       |                    |                                         |
| Cysteine                                |                    | <i>0.001</i>       |                                         |
| Cystine                                 |                    | <i>0.001</i>       |                                         |
| Docosahexaenoic acid                    |                    | <i>0.000</i>       |                                         |
| Dodecanoic acid                         |                    | <i>0.000</i>       | <i>0.078</i>                            |
| Eicosapentaenoic acid                   |                    | <i>0.000</i>       |                                         |
| Eicosatetraenoic acid                   |                    | <i>0.000</i>       | <i>0.044</i>                            |
| Erythritol                              |                    | <i>0.005</i>       |                                         |
| Fructose                                |                    | <i>0.002</i>       |                                         |
| Fumaric acid                            |                    | <i>0.004</i>       |                                         |
| Glucose                                 |                    | <i>0.001</i>       | <i>0.046</i>                            |

|                      |              |              |              |
|----------------------|--------------|--------------|--------------|
| Glutamic acid        |              | <b>0.013</b> |              |
| <b>Glutamine</b>     | <b>0.028</b> | <b>0.008</b> |              |
| Glycerol-2-phosphate |              |              |              |
| Glycerol-3-phosphate |              | <b>0.023</b> |              |
| Glycine              |              | <b>0.011</b> |              |
| Heptadecanoic acid   |              | <b>0.000</b> |              |
| Hexadecanoic acid    |              | <b>0.000</b> |              |
| Inosine              |              |              |              |
| Inositol             |              | <b>0.001</b> |              |
| Isoleucine           |              | <b>0.000</b> |              |
| Lactic acid          |              | <b>0.001</b> |              |
| <b>Lysine</b>        | <b>0.089</b> | <b>0.010</b> |              |
| Malic acid           |              | <b>0.099</b> | <b>0.098</b> |
| Myristoleic acid     |              | <b>0.000</b> |              |
| Octadecadienoic acid |              | <b>0.000</b> |              |
| Octadecanoic acid    |              | <b>0.000</b> | <b>0.045</b> |
| Octadecenoic acid    |              | <b>0.000</b> | <b>0.071</b> |
| <b>Phenylalanine</b> | <b>0.098</b> | <b>0.000</b> | <b>0.043</b> |
| Pyroglutamic acid    |              | <b>0.000</b> |              |
| Serine               |              | <b>0.000</b> |              |
| Tryptophan           |              | <b>0.003</b> |              |
| <b>Tyrosine</b>      | <b>0.099</b> | <b>0.000</b> | <b>0.004</b> |
| <b>Urea</b>          | <b>0.005</b> | <b>0.001</b> |              |
| Uric acid            |              | <b>0.001</b> |              |
| Valine               |              | <b>0.000</b> |              |

**Table S6B. Changes in serum metabolites in the fasting and post-OGTT state after sleep loss (wake) compared with after sleep.**

| Compound name                           | Baseline (fasting) differences      |             |              | Post-OGTT differences               |             |              |
|-----------------------------------------|-------------------------------------|-------------|--------------|-------------------------------------|-------------|--------------|
|                                         | Log <sub>2</sub> ratio (wake:sleep) | S.E.M.      | P-value      | Log <sub>2</sub> ratio (wake:sleep) | S.E.M.      | P-value      |
| 1-palmitoyl-sn-glycero-3-phosphocholine | -0.01                               | 0.06        |              | -0.01                               | 0.08        |              |
| <b>1,5-anhydro-d-glucitol</b>           | <b>-0.06</b>                        | <b>0.02</b> | <b>0.013</b> | <b>-0.05</b>                        | <b>0.03</b> | <b>0.095</b> |
| 2-aminobutyric acid                     | 0.00                                | 0.20        |              | -0.30                               | 0.24        |              |
| <b>2-oxoisocaproic acid</b>             | <b>0.14</b>                         | <b>0.06</b> | <b>0.021</b> | 0.06                                | 0.07        |              |
| <b>3-hydroxybutyric acid</b>            | <b>0.83</b>                         | <b>0.39</b> | <b>0.054</b> | 0.07                                | 0.18        |              |
| Adenosine                               | -0.15                               | 0.30        |              | -0.23                               | 0.18        |              |
| Alanine                                 | -0.17                               | 0.19        |              | 0.03                                | 0.22        |              |
| Alpha-tocopherol                        | -0.05                               | 0.11        |              | 0.04                                | 0.04        |              |



|                          |              |             |              |              |             |                  |
|--------------------------|--------------|-------------|--------------|--------------|-------------|------------------|
| <b>Arabitol</b>          | -0.02        | 0.06        |              | <b>0.11</b>  | <b>0.06</b> | <b>0.091</b>     |
| <b>Arginine</b>          | <b>-0.15</b> | <b>0.06</b> | <b>0.029</b> | -0.10        | 0.07        |                  |
| <b>Asparagine</b>        | <b>-0.18</b> | <b>0.04</b> | <b>0.001</b> | -0.06        | 0.07        |                  |
| Campesterol              | 0.10         | 0.18        |              | -0.03        | 0.15        |                  |
| Citric acid              | -0.04        | 0.08        |              | -0.15        | 0.11        |                  |
| <b>Creatinine</b>        | -0.15        | 0.10        |              | <b>-0.30</b> | <b>0.07</b> | <b>&lt;0.001</b> |
| Cysteine                 | -0.01        | 0.06        |              | -0.05        | 0.07        |                  |
| Cystine                  | -0.04        | 0.10        |              | 0.07         | 0.04        |                  |
| Docosahexaenoic acid     | -0.03        | 0.09        |              | -0.17        | 0.10        |                  |
| Dodecanoic acid          | 0.13         | 0.15        |              | -0.19        | 0.12        |                  |
| Eicosapentaenoic acid    | 0.05         | 0.06        |              | -0.01        | 0.06        |                  |
| Eicosatetraenoic acid    | 0.04         | 0.05        |              | -0.11        | 0.06        |                  |
| Erythritol               | -0.02        | 0.02        |              | -0.05        | 0.05        |                  |
| Fructose                 | -0.29        | 0.21        |              | 0.03         | 0.18        |                  |
| Fumaric acid             | 0.06         | 0.14        |              | 0.13         | 0.16        |                  |
| <b>Glucose</b>           | -0.05        | 0.03        |              | <b>0.05</b>  | <b>0.03</b> | <b>0.069</b>     |
| Glutamic acid            | 0.04         | 0.08        |              | 0.16         | 0.12        |                  |
| <b>Glutamine</b>         | <b>-0.45</b> | <b>0.21</b> | <b>0.051</b> | -0.34        | 0.22        |                  |
| Glycerol-2-phosphate     | -0.01        | 0.06        |              | -0.02        | 0.11        |                  |
| Glycerol-3-phosphate     | -0.06        | 0.05        |              | -0.07        | 0.08        |                  |
| Glycine                  | -0.13        | 0.10        |              | -0.06        | 0.07        |                  |
| Heptadecanoic acid       | 0.08         | 0.11        |              | -0.05        | 0.11        |                  |
| Hexadecanoic acid        | 0.10         | 0.08        |              | -0.01        | 0.05        |                  |
| Inosine                  | -0.01        | 0.19        |              | -0.10        | 0.14        |                  |
| Inositol                 | 0.00         | 0.04        |              | 0.03         | 0.05        |                  |
| Isoleucine               | -0.01        | 0.07        |              | 0.00         | 0.07        |                  |
| Lactic acid              | 0.09         | 0.07        |              | 0.04         | 0.12        |                  |
| Lysine                   | -0.37        | 0.28        |              | -0.50        | 0.31        |                  |
| Malic acid               | 0.17         | 0.11        |              | -0.02        | 0.06        |                  |
| Myristoleic acid         | 0.17         | 0.17        |              | -0.17        | 0.25        |                  |
| Octadecadienoic acid     | 0.11         | 0.10        |              | -0.03        | 0.09        |                  |
| <b>Octadecanoic acid</b> | <b>0.10</b>  | <b>0.06</b> | <b>0.081</b> | -0.05        | 0.05        |                  |
| Octadecenoic acid        | 0.18         | 0.14        |              | -0.14        | 0.17        |                  |
| <b>Ornithine</b>         | <b>-0.14</b> | <b>0.05</b> | <b>0.017</b> | -0.07        | 0.06        |                  |
| <b>Phenylalanine</b>     | 0.01         | 0.04        |              | <b>0.13</b>  | <b>0.06</b> | <b>0.040</b>     |
| Pyroglutamic acid        | 0.01         | 0.04        |              | 0.02         | 0.02        |                  |

|                  |              |             |              |              |             |              |
|------------------|--------------|-------------|--------------|--------------|-------------|--------------|
| Serine           | -0.08        | 0.05        |              | -0.01        | 0.07        |              |
| <b>Threonine</b> | <b>-0.19</b> | <b>0.07</b> | <b>0.015</b> | <b>-0.14</b> | <b>0.05</b> | <b>0.019</b> |
| Tryptophan       | 0.00         | 0.04        |              | 0.04         | 0.04        |              |
| <b>Tyrosine</b>  | 0.00         | 0.13        |              | <b>-0.51</b> | <b>0.19</b> | <b>0.019</b> |
| <b>Urea</b>      | <b>-0.33</b> | <b>0.11</b> | <b>0.012</b> | <b>-0.41</b> | <b>0.17</b> | <b>0.032</b> |
| <b>Uric acid</b> | -0.03        | 0.06        |              | <b>-0.07</b> | <b>0.03</b> | <b>0.064</b> |
| Valine           | -0.03        | 0.055       |              | 0.00         | 0.04        |              |

**Table S6C. Changes in *skeletal muscle* metabolites after sleep loss (wake) compared with after sleep.**

| Compound name             | Log <sub>2</sub> ratio (wake:sleep) | S.E.M.      | P-value      |
|---------------------------|-------------------------------------|-------------|--------------|
| 1,5-anhydroglucitol       | -0.06                               | 0.08        |              |
| 3-hydroxybutyric acid     | 0.60                                | 0.39        |              |
| Adenosine-5-monophosphate | 0.24                                | 0.14        |              |
| Adenosine                 | 0.01                                | 0.18        |              |
| Alanine                   | -0.05                               | 0.09        |              |
| Beta-alanine              | -0.16                               | 0.15        |              |
| Cholesterol               | 0.07                                | 0.09        |              |
| Citrulline                | 0.02                                | 0.11        |              |
| Creatinine                | 0.06                                | 0.07        |              |
| Fructose-6-phosphate      | 0.29                                | 0.38        |              |
| Fructose                  | 0.15                                | 0.31        |              |
| <b>Fumaric acid</b>       | <b>-0.39</b>                        | <b>0.19</b> | <b>0.057</b> |
| Glucose-6-phosphate       | 0.52                                | 0.39        |              |
| Glucose                   | 0.36                                | 0.26        |              |
| Glutamic acid             | -0.13                               | 0.17        |              |
| Glutamine                 | -0.41                               | 0.23        |              |
| Glutamine                 | -0.39                               | 0.29        |              |
| Glutamine                 | -0.27                               | 0.20        |              |
| Glyceric acid-3-phosphate | -0.10                               | 0.18        |              |
| Glycerol-2-phosphate      | -0.19                               | 0.18        |              |
| Glycerol-3-phosphate      | -0.23                               | 0.16        |              |
| <b>Glycine</b>            | <b>-0.20</b>                        | <b>0.12</b> | <b>0.046</b> |
| Glycine                   | -0.13                               | 0.15        |              |
| Heptadecanoic acid        | 0.03                                | 0.14        |              |
| <b>Hexadecanoic acid</b>  | <b>0.17</b>                         | <b>0.08</b> | <b>0.065</b> |
| Histidine                 | -0.01                               | 0.14        |              |
| Inosine                   | -0.21                               | 0.49        |              |
| Inositol, scyllo          | -0.04                               | 0.10        |              |

|                    |              |             |              |
|--------------------|--------------|-------------|--------------|
| Isoleucine         | 0.04         | 0.10        |              |
| Lysine             | 0.07         | 0.12        |              |
| Malic acid         | 0.11         | 0.15        |              |
| Octadecanoic acid  | 0.11         | 0.08        |              |
| Octadecenoic acid  | 0.24         | 0.13        |              |
| Ornithine          | 0.06         | 0.13        |              |
| Pantothenic acid   | -0.14        | 0.14        |              |
| Phosphate-fragment | 0.01         | 0.05        |              |
| Proline            | -0.13        | 0.09        |              |
| Pyroglutamic acid  | 0.03         | 0.07        |              |
| Pyrophosphate      | -0.19        | 0.14        |              |
| Serine             | -0.09        | 0.09        |              |
| Succinic acid      | -0.10        | 0.08        |              |
| Taurine            | -0.29        | 0.20        |              |
| <b>Threonine</b>   | <b>-0.16</b> | <b>0.09</b> | <b>0.051</b> |
| <b>Urea</b>        | <b>-0.42</b> | <b>0.22</b> | <b>0.061</b> |
| Uric acid          | -0.07        | 0.30        |              |
| Valine             | 0.02         | 0.09        |              |

**Table S6D. Changes in *subcutaneous adipose tissue* metabolites after sleep loss (wake) compared with after sleep.**

| <b>Compound name</b>             | <b>Log<sub>2</sub> ratio (wake:sleep)</b> | <b>S.E.M.</b> | <b>P-value</b> |
|----------------------------------|-------------------------------------------|---------------|----------------|
| 1,5-Anhydro-d-glucitol           | 0.17                                      | 0.17          |                |
| <b>3-Hydroxybutyric acid</b>     | <b>0.73</b>                               | <b>0.35</b>   | <b>0.045</b>   |
| 4-Hydroxybenzoic acid            | 0.44                                      | 0.43          |                |
| Adenosine-5-monophosphate        | 0.43                                      | 0.54          |                |
| Adenosine                        | 0.48                                      | 0.29          |                |
| Alanine                          | 0.25                                      | 0.18          |                |
| <b>Asparagine</b>                | <b>0.69</b>                               | <b>0.39</b>   | <b>0.089</b>   |
| <b>Aspartic acid</b>             | <b>0.52</b>                               | <b>0.24</b>   | <b>0.039</b>   |
| Citric acid                      | 0.38                                      | 0.27          |                |
| Creatinine                       | -0.39                                     | 0.32          |                |
| Dodecanoic acid                  | 0.14                                      | 0.08          |                |
| Glucose                          | 0.22                                      | 0.26          |                |
| <b>Glutamic acid</b>             | <b>0.53</b>                               | <b>0.23</b>   | <b>0.027</b>   |
| Glutamine                        | 0.42                                      | 0.38          |                |
| <b>Glyceric acid-3-phosphate</b> | <b>1.21</b>                               | <b>0.51</b>   | <b>0.020</b>   |
| Glycerol-3-phosphate             | 0.30                                      | 0.25          |                |
| Glycine                          | 0.20                                      | 0.20          |                |
| Inositol                         | 0.08                                      | 0.13          |                |

|                          |             |             |              |
|--------------------------|-------------|-------------|--------------|
| Inositol                 | 0.17        | 0.14        |              |
| Isoleucine               | 0.20        | 0.22        |              |
| Lactic acid              | 0.21        | 0.14        |              |
| Lysine                   | 0.29        | 0.26        |              |
| <b>Malic acid</b>        | <b>0.42</b> | <b>0.15</b> | <b>0.010</b> |
| Myristic acid            | 0.08        | 0.15        |              |
| <b>Nonanoic acid</b>     | <b>0.13</b> | <b>0.06</b> | <b>0.042</b> |
| <b>Octadecanoic acid</b> | <b>0.12</b> | <b>0.07</b> | <b>0.098</b> |
| Octadecenoic acid        | -0.28       | 0.59        |              |
| Ornithine                | 0.31        | 0.33        |              |
| Phosphoric acid          | 0.10        | 0.20        |              |
| Proline                  | 0.27        | 0.26        |              |
| <b>Pyroglutamic acid</b> | <b>0.49</b> | <b>0.22</b> | <b>0.032</b> |
| <b>Succinic acid</b>     | <b>0.19</b> | <b>0.10</b> | <b>0.068</b> |
| Threonine                | 0.13        | 0.17        |              |
| Tyrosine                 | 0.34        | 0.27        |              |
| Valine                   | 0.26        | 0.22        |              |

## Supplementary Methods

### DNA extraction and DNA methylation analyses

For genomic DNA extraction from subcutaneous adipose tissue and skeletal muscle samples, the QIAamp DNA Mini Kit was used (Qiagen, Hilden, Germany). Concentration and purity of DNA was determined using NanoDrop (ND-1000, Thermo Fisher, MA, USA) and the Quant-iT™ PicoGreen® dsDNA Assay Kit (Thermo Fisher). The EZ DNA Methylation-Gold™ kit (Zymo Research, Irvine, CA, USA) was used to carry out bisulfite conversion, as detailed in ref. (64). The Illumina Infinium Methylation Assay protocol was employed to process around 200 ng of bisulfate-converted DNA (bisulfite treatment results in the conversion of cytosine (C) nucleotides that are unmethylated into uracil/thymine (U/T) nucleotides). Following whole-genome DNA amplification, DNA was enzymatically fragmented, precipitated and resuspended. To hybridize locus-specific oligonucleotide primers on the BeadChip, the DNA was then run overnight at 48° C. Following hybridization to the BeadChips, C or T nucleotides were detected using extension of single-base primers and the Illumina iScan was used to measure C- or T-nucleotide corresponding fluorescence signals. To separate possible batch effects from biological signals, respectively, several technical and biological replicates were included (at least one from each of the two experimental conditions).

GenomeStudio 2009.2 (Illumina) was used for initial preprocessing of the fluorescence data, followed by quality control. This included hierarchical clustering for plotting relationships between samples and identifying outliers, and ensuring that technical replicates clustered together. The log<sub>2</sub> ratio of the methylated probe versus unmethylated probe intensities (the M-value) was used for methylation analyses – a statistically more valid representative analysis of differential methylation levels (65).

For the R-based analysis, the package minfi was used (66): Probes with a detection p-value over 0.01 were removed from the analysis, as were probes overlapping SNPs and non-specific probes. Quantile normalization was used to adjust for systematic differences between arrays, and ComBat was used to adjust for batch effects. Data from adipose and muscle were processed separately. DMRs were called using DMRcate (v 1.14.0) (67), which finds differentially methylated regions (DMRs) using a gaussian kernel, ranking the most differentially methylated regions based on a tunable kernel smoothing, that is unbiased by genomic annotation and local differential change in methylation signal. For DMRcate, a model with coefficients for both subject and sleep condition was used, with following parameters and thresholds: lambda = 1000, C = 2, probe FDR < 0.05 and DMR FDR < 0.05. DMRs were then annotated to the nearest a transcription start site within 5Kbp, based on ENSEMBL genome annotations. Fishers exact test was used to for analyzing enrichment of Gene Ontology and KEGG sets among the genes near DRMs, given a background set of all genes near probes on the 450K array. Gene sets with FDR<0.05 were reported.

### RNA extraction, qPCR and RNA-seq workflow

RNA extraction was done using Trizol followed by the Qiagen Universal RNeasy Tissue kit for skeletal muscle and the Qiagen RNeasy Lipid kit for adipose tissue samples. RNA concentration and integrity were determined using NanoDrop, and subsequently by Fragment analyzer (Advanced Analytical Technologies) and TapeStation 2200 (Agilent Technologies) (RQN 7.30 ± 0.12 for adipose tissue RNA; RINe 8.46 ± 0.05 for muscle tissue RNA). The SYBR green and Taqman systems (Applied Biosystems) were employed to measure mRNA gene expression, as described in REFs (68, 69). SYBR green primers were designed to span exons using Primer3 (<http://bioinfo.ut.ee/primer3/>) or NCBI Primer-BLAST (<http://www.ncbi.nlm.nih.gov/tools/primer-blast/>), and were optimized for each target gene. All samples for qPCR were analyzed in duplicates and the ΔCt method

(70) was used to normalize the data against the expression of the most consistently expressed house-keeping genes, PPIA and TBP.

RNA library generation (from 0.5 µg total RNA per sample) was performed using the TruSeq Stranded Total RNA kit (Illumina) according to the manufacturers' protocol (#15031048 rev E). All samples were sequenced with paired-end 50-bp read lengths, using the v4 sequencing chemistry, on an Illumina HiSeq2500.

### **Transcriptome analysis**

The RNA-seq pipeline (NGI, Sweden, <https://github.com/ewels/NGI-RNAseq>) for basic processing of RNA-seq data, included fastqc and RseQc for quality control; Trimgalore for trimming reads; STAR for read alignment (71); Picard for removal of duplicate read (72); and featureCounts for counting aligned reads to ENSEMBL genes (73). The R package gplots was then used to generate PCA plots, which showed a clear separation between adipose tissue and skeletal muscle samples (data not shown), and a high correlation between samples within each tissue (>97% Pearson correlation; data not shown); however, no clear separation was found within each tissue for our intervention (sleep vs. sleep deprivation; data not shown). The R package EdgeR (v. 3.16.5) was used to perform differential gene expression from the data generated by featureCounts, with a model with coefficients for both subject and sleep condition (74). Gene set enrichment analysis was carried out using the R package GAGE (v. 2.24), using Gene Ontology annotations and KEGG pathways (75). In addition, Enrichr (76) was used to look for significant overlaps between differentially expressed genes and gene sets based on ChIP data from the ChEA database (63). For correlational analyses between mRNA and DNA methylation levels, ggplot2 and ggExtra were used and DNA methylation levels were averaged for all probes near each gene included in the analysis.

### **Label-free quantification of relative protein expression using liquid chromatography and tandem mass spectrometry (LC-MS/MS)**

Biopsy aliquots were dissolved in a 20 mM HEPES, 9 M Urea lysis buffer supplemented with complete mini EDTA-free protease inhibitor cocktail (Roche Diagnostics Scandinavia, Stockholm, Sweden) and homogenized using micro pestles. Proteins were extracted by sonication using a probe with a 3-mm tip (10 x 1 sec, amplitude 30%) followed by centrifugation for 10 min at 4 °C. The lipid layer of the subcutaneous adipose tissue samples was removed after the final centrifugation step.

For each sample, the total protein concentration was measured using the Bradford Protein Assay (Bio-Rad, Hercules, California, USA). Aliquots corresponding to 20 µg for muscle samples and 10 µg for adipose samples were taken out for digestion. The proteins were reduced with dithiothreitol (DTT, final concentration 50 mM) and alkylated with iodoacetamide (IAA, final concentration 25 mM). After dilution four times with 50 mM ammonium bicarbonate, trypsin (Promega, Madison, WI, USA) was added in a trypsin:protein ratio of 1:20 and digestion was performed overnight at 37 °C. Thereafter the peptides were desalted using Pierce C18 Spin Columns (Thermo Scientific), dried and resolved in 0.1% formic acid (FA) to a final concentration of 0.1 µg/µL for muscle samples and 0.3µg/µL for adipose samples.

The samples were analyzed using a Q Exactive Plus mass spectrometer (Thermo Fisher Scientific, Bremen, Germany) equipped with a nano electrospray ion source. A volume of 5 µL of dissolved peptides was loaded and peptides were separated by reversed phase liquid chromatography using an EASY-nLC 1000 system (Thermo Fisher Scientific, Bremen, Germany). A setup of pre-column and analytical column was used. The pre-column was a 2 cm EASY-column (1D 100 µm, 5 µm C18) (Thermo Fisher Scientific) while the analytical column was a 10 cm EASY-column (ID 75 µm, 3 µm, C18) (Thermo Fisher Scientific). Peptides were eluted with a 150-min linear gradient from 4% to 100% acetonitrile at 250 nL/min. The mass spectrometer was

operated in positive ionization mode acquiring a survey mass spectrum with resolving power 70000 (full width half maximum) and consecutive high collision dissociation (HCD) fragmentation spectra at a resolution of 17500 of the 10 most abundant ions. The mass spectrometer worked in the data-dependent mode. The acquired MS data (.RAW-files) were processed by MaxQuant (v. 1.5.1.2) (77). gplots (R package) was used to generate PCA plots of the processed data, but indicated no clear separation within each tissue for our sleep vs. sleep deprivation intervention (data not shown).

For correlational analyses between mRNA and protein expression levels, gplots and edgeR were used. Identified mRNAs and proteins were first filtered, so that only mRNAs/proteins where both the mRNA and proteins had non-zero measurements were included in the analysis. For each analyzed tissue, data from all 30 samples were then merged. Only mRNA/protein pairs where there was a 1:1 mapping between gene and protein were used.

Pathway analysis of proteomics data was carried out using the R package limma (v. 3.30.13) using KEGG pathway annotations (78).

### **Gas chromatography-mass spectrometry (GCMS) metabolomic analyses**

Gas chromatography-mass spectrometry (GCMS) was performed as previously described in refs. (79) and (80). For skeletal muscle and serum samples, extraction buffer (1000  $\mu$ L; 80/20 v/v methanol:water) with internal standards was added to the tissue sample (9-12 mg). A tungsten bead was added to the sample, which was then shaken in a mixer mill at 30 Hz for 3 min. For GCMS of serum, extraction buffer (900  $\mu$ L; 90/10 v/v methanol:water) with internal standards was added to sample material (100  $\mu$ L). A mixer mill was used to shake the sample at 30 Hz for 3 min, and the sample was then left at +4 °C on ice to precipitate proteins. After the above steps for muscle tissue and serum, the sample was centrifuged (+4 °C, 14 000 rpm, 10 min) and 200  $\mu$ L of the supernatant were transferred to a micro vial, followed by solvent evaporation. For adipose tissue samples, CHCl<sub>3</sub>:methanol (250  $\mu$ L of 2/1; v/v) with D<sub>4</sub>-Cholic Acid, 50  $\mu$ L of water with <sup>13</sup>C<sub>9</sub>-phenylalanine, and 2 tungsten beads were added to each sample. The samples were shaken at 30 Hz for 3 min followed by removal of the beads. The samples were then left standing at room temperature for 30 min. The samples were centrifuged (14 000 rpm, +4 °C, 3 min) after which 40  $\mu$ L of the aqueous phase were transferred to Eppendorf tubes. Methanol (160  $\mu$ L) with D<sub>6</sub>-salicylic acid was added to the Eppendorf tubes and remaining proteins were precipitated for one hour at -20 °C. Centrifugation followed (14 000 rpm, +4 °C, 10 min), after which 35  $\mu$ L supernatant were transferred to GC vials. After evaporation of the solvents, the samples were stored in -80 °C until analysis.

Sample derivatization was performed according to refs. (79) and (80). For serum and muscle, methoxyamine (30  $\mu$ L at 15  $\mu$ g/ $\mu$ L in pyridine) was added to the dry sample after which it was shaken vigorously for 10 min. The reaction was then started by keeping the sample at +70 °C for 60 min before proceeding at room temperature for 16 hours. MSTFA (30  $\mu$ L) was then added, the sample was shaken, and was left to for 1 hour in room temperature; methyl stearate (30  $\mu$ L at 15 ng/ $\mu$ L, in heptane) was added before analysis. Adipose tissue sample derivatization started with a smaller addition of methoxyamine (5  $\mu$ L at 15  $\mu$ g/ $\mu$ L, in pyridine) to the dry sample. The sample was shaken for 10 min prior to 16 hours of incubation at room temperature. After adding MSTFA (5  $\mu$ L), the sample was again shaken and left to react for 60 min at room temperature. Before analysis, methyl stearate (5  $\mu$ L at 15 ng/ $\mu$ L, in heptane) was added to the sample.

For the GCMS analysis, 1  $\mu$ L of derivatized sample was injected in splitless mode via a CTC Combi Pal autosampler (CTC Analytics AG, Switzerland) into an Agilent 6890 gas chromatograph (10 m x 0.18 mm fused silica capillary column, with a chemically bonded 0.18  $\mu$ m stationary DB 5-MS UI stationary phase from J&W

Scientific). The effluent of the column was introduced into a Pegasus III time-of-flight mass spectrometer GC/TOFMS (Leco Corp., St Joseph, MI, USA).

Following mass spectrometry analysis, non-processed MS files were exported in NetCDF format to MATLAB R2011b, in which custom scripts were used for pre-analytical procedures (including base-line correction, chromatogram alignment, data compression), as described in ref. (81).

### **Biochemical analyses**

Insulin sensitivity in the fasted state was calculated using the HOMA-IR method (82). OGTT-related insulin sensitivity was calculated using the Matsuda index (62). The ANOVA analysis for cortisol was adjusted for significant sphericity deviation with the Greenhouse-Geiser method for Time and Wake\*Time effects.
